# Supplementary material for: High-dose electronic media use in five-year-olds and its association with their psychosocial symptoms: a cohort study
Source: PubMed Central journal article supplement — BMJ Open. 2021 Mar 17;11(3):e040848. doi: 10.1136/bmjopen-2020-040848 (PMC7978091; doi:10.1136/bmjopen-2020-040848), 2021-03-17
Supplement: bmjopen-2020-040848.draft_revisions.pdf [file bmjopen-2020-040848.draft_revisions.pdf]

# BMJ Open

BMJ Open is committed to open peer review. As part of this commitment we make the peer review history of every article we publish publicly available.

When an article is published we post the peer reviewers' comments and the authors' responses online. We also post the versions of the paper that were used during peer review. These are the versions that the peer review comments apply to.

The versions of the paper that follow are the versions that were submitted during the peer review process. They are not the versions of record or the final published versions. They should not be cited or distributed as the published version of this manuscript.

BMJ Open is an open access journal and the full, final, typeset and author-corrected version of record of the manuscript is available on our site with no access controls, subscription charges or pay-per-view fees (<http://bmjopen.bmj.com>).

If you have any questions on BMJ Open's open peer review process please email [info.bmjopen@bmj.com](mailto:info.bmjopen@bmj.com)

# BMJ Open

## Preschoolers' high-dose electronic media use and its association with their psychosocial well-being at five years of age

|                               |                                                                                                                                                                                                                                                                                                                                                                                                                    |
|-------------------------------|--------------------------------------------------------------------------------------------------------------------------------------------------------------------------------------------------------------------------------------------------------------------------------------------------------------------------------------------------------------------------------------------------------------------|
| Journal:                      | <i>BMJ Open</i>                                                                                                                                                                                                                                                                                                                                                                                                    |
| Manuscript ID                 | bmjopen-2020-040848                                                                                                                                                                                                                                                                                                                                                                                                |
| Article Type:                 | Original research                                                                                                                                                                                                                                                                                                                                                                                                  |
| Date Submitted by the Author: | 27-May-2020                                                                                                                                                                                                                                                                                                                                                                                                        |
| Complete List of Authors:     | Niiranen, Janette; Finnish Institute for Health and Welfare, Department of Public Health Solutions<br>Kiviruusu, Olli; Finnish Institute for Health and Welfare<br>Vornanen, Riitta; University of Eastern Finland - Kuopio Campus<br>Saarenpää-Heikkilä, Outi; University of Tampere, Pediatric Clinics<br>Paavonen, Juulia; Finnish Institute for Health and Welfare; University of Helsinki Faculty of Medicine |
| Keywords:                     | Child & adolescent psychiatry < PSYCHIATRY, EPIDEMIOLOGY, Community child health < PAEDIATRICS                                                                                                                                                                                                                                                                                                                     |
|                               |                                                                                                                                                                                                                                                                                                                                                                                                                    |

SCHOLARONE™  
Manuscripts

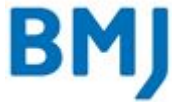

I, the Submitting Author has the right to grant and does grant on behalf of all authors of the Work (as defined in the below author licence), an exclusive licence and/or a non-exclusive licence for contributions from authors who are: i) UK Crown employees; ii) where BMJ has agreed a CC-BY licence shall apply, and/or iii) in accordance with the terms applicable for US Federal Government officers or employees acting as part of their official duties; on a worldwide, perpetual, irrevocable, royalty-free basis to BMJ Publishing Group Ltd ("BMJ") its licensees and where the relevant Journal is co-owned by BMJ to the co-owners of the Journal, to publish the Work in this journal and any other BMJ products and to exploit all rights, as set out in our [licence](#).

The Submitting Author accepts and understands that any supply made under these terms is made by BMJ to the Submitting Author unless you are acting as an employee on behalf of your employer or a postgraduate student of an affiliated institution which is paying any applicable article publishing charge ("APC") for Open Access articles. Where the Submitting Author wishes to make the Work available on an Open Access basis (and intends to pay the relevant APC), the terms of reuse of such Open Access shall be governed by a Creative Commons licence – details of these licences and which [Creative Commons](#) licence will apply to this Work are set out in our licence referred to above.

Other than as permitted in any relevant BMJ Author's Self Archiving Policies, I confirm this Work has not been accepted for publication elsewhere, is not being considered for publication elsewhere and does not duplicate material already published. I confirm all authors consent to publication of this Work and authorise the granting of this licence.

1  
2  
3  
4  
5  
6  
7 Niiranen J<sup>1</sup>, Kiviruusu O<sup>1</sup>, Vornanen R<sup>2</sup>, Saarenpää-Heikkilä O<sup>3,4</sup>, Paavonen EJ<sup>1,5</sup>.  
8  
9  
10  
11  
12  
13

14 1 Department of Public Health Solutions, Finnish Institute for Health and Welfare, Helsinki,  
15 Finland  
16

17 2 University of Eastern Finland, Department of Social Sciences, Kuopio, Finland

18 3 Pediatric Clinics, Tampere University Hospital, Tampere, Finland

19 4 Tampere Centre for Child Health Research, University of Tampere and Tampere University  
20 Hospital, Tampere, Finland

21 5 Pediatric Research Center, Child Psychiatry, University of Helsinki and Helsinki University  
22 Hospital, Helsinki, Finland  
23  
24  
25

26 **Corresponding author**  
27  
28

29 juulia.paavonen@helsinki.fi  
30  
31  
32  
33  
34  
35  
36  
37  
38  
39  
40  
41  
42  
43  
44  
45  
46  
47  
48  
49  
50  
51  
52  
53  
54  
55  
56  
57  
58  
59  
60

## Abstract

**Objectives** This study investigated the frequency of preschooler's electronic media (e-media) usage and the risks of high-dose e-media use on young children's psychosocial well-being.

**Design** We study longitudinal associations between e-media use at 18 months and psychosocial symptoms at five years of age, as well as cross-sectional associations between e-media use and psychosocial symptoms at five years.

**Setting** Between 2011 and 2017 in Finland.

**Participants** Children aged 5 years (N=699).

**Primary and secondary outcome measures** Children's psychosocial symptoms were asked at the age of five years using the parent-reported questionnaires Five-to-Fifteen (FTF) and the Strengths and Difficulties Questionnaire (SDQ).

**Results** Based on our results, 95% of the preschoolers exceed the daily electronic media use recommendation set by health professionals. Our results indicate that increased screen time at five years of age is associated with a risk of multiple psychosocial symptoms (OR 1.53-2.18, 95% CI: 1.05-3.20,  $p<0.05$ ), while increased levels of e-media use at 18 months was only associated with FTF peer problems (OR 1.59, CI: 1.04-2.41,  $p=0.03$ ). Moreover, high-dose use of electronic games at the age of five years seems to be associated with fewer risks for psychosocial well-being than program viewing, as it was only associated with SDQ hyperactivity (OR 1.65, CI 1.49-3.20,  $p=0.02$ ).

**Conclusion** Increased screen time has multiple risks for children's psychosocial well-being. These risk factors might accumulate in the long term, and cause problems in children's socio-emotional development later on. Health professionals and pediatricians have an important role as communicators of the current research results on the safe usage time of e-media for families, and enhance parents' skills as regulators of children's safe e-media use. In the future, more research is needed on the family conditions of high-dose e-media users.

### Strengths and limitations of this study

- A major strength of our study is the longitudinal study setting and repeated measurement of e-media exposure.
- Additionally, patterns of children's electronic media use are rapidly changing, and our study offers results on the associations of young children's e-media usage with their psychosocial well-being based on recent data.
- The limitation of our study is the measurement of e-media use that was based on parental questionnaires and not logs.
- Moreover, the sample is based on a representative birth cohort recruited during pregnancy and therefore it is not affected by selection bias, although those with lower education seem to be underrepresented in the sample, as are single mothers.

# Preschoolers' high-dose electronic media use and its association with their psychosocial well-being at five years of age

## Introduction

In recent years, as digital technology has rapidly developed, electronic media (e-media) has become an almost universal part of young children's daily life. Even at preschool age, e-media use is already a popular sedentary behavior (1). Traditional e-media is often used: nearly half of preschool-age children watch TV (2), use a laptop or desktop computer, and play video consoles daily (3). However, the pattern of how media is used has changed considerably in recent years, as preschool children's use of mobile devices has tripled from 2013 to 2017, although the overall amount of e-media use has remained relatively stable (2). Recent studies also report that a large proportion (81.3%) of 4-year-old children play games, use applications, or watch videos on mobile devices daily (3).

The World Health Organization (WHO) has published guidelines for e-media use of children aged 2-4. The recommendation is a maximum of one hour per day for this age group (4). However, in previous studies, much higher amounts have been reported. For example, among American children aged 2-4, the average total screen time per day was 159 minutes (2), and among Finnish children aged 3-6 it was 111 min (5). It seems that parents may be unaware of the potential risks of high-dose e-media usage for their children's psychosocial well-being. Studies have even pointed out that some parents use e-media devices as a tool to calm down their children (6,7), especially when the child has social emotional difficulties (6). Furthermore, studies suggest that frequent e-media use in family households might interrupt parent-child interaction, which might cause problems in children's social-emotional development (1,8-10).

Based on the research, it seems that a high amount of program viewing is a risk for preschool-age children's psychosocial well-being (8). It is associated with externalizing problems, such as hyperactivity (10,11) and conduct problems (11-13), and also with peer problems (14). However, fewer studies have investigated the associations between electronic game-playing and preschool-age children's psychosocial well-being (11,15,16). According to these studies, it seems that electronic game-playing might be less detrimental and may even have some positive effects on children's socio-emotional skills (15). Nonetheless, the use of electronic games and computers are associated with internalizing problems, such as emotional problems (16).

As the pattern of children's electronic media usage is rapidly changing, the updated data on the degree of e-media usage and its significance on well-being is needed. Moreover, although there is evidence showing the harmful effects of preschool-age children's high-dose e-media use on their well-being, few of these studies have analyzed the longitudinal associations of early exposure of e-media to children's later psychosocial problems. According to these studies it seems that high-dose e-media use that starts at early age might be detrimental for young children's psychosocial health later on (10,11,16).

1  
2  
3  
4 The aim of this research is to assess the amount of preschooler's e-media usage and its associations  
5 with their psychosocial well-being. We study longitudinal associations between e-media use at 18  
6 months and psychosocial symptoms at five years of age, as well as cross-sectional associations  
7 between e-media use (program viewing and electronic game-playing) and psychosocial symptoms  
8 at five years. Psychosocial symptoms, i.e., internalizing and externalizing problems, were assessed  
9 at five years of age. We hypothesized that children who consume large amounts of e-media at 18  
10 months of age have more psychosocial symptoms at five years than those who use less. Moreover,  
11 we hypothesized that program viewing is associated with more problems in psychosocial health,  
12 while use of e-games has less associations with negative outcomes.  
13  
14  
15  
16

## 17 **Method**

### 18 **Study design**

19  
20 This study is part of a larger Finnish CHILD-SLEEP longitudinal birth cohort study, which includes  
21 several measurement points. The study design, protocol, participants, and measures have been  
22 described in more detail in Paavonen et al. (2017). The recruitment and baseline measurement took  
23 place prenatally at the 32nd week and the follow-up measurements occurred at the birth of the child  
24 and at three, eight, 18, 24 and 60 months of age. Moreover, records from the maternity hospital and  
25 maternity clinics were collated. The study protocol was approved by the local Hospital District  
26 Ethical Committee (9.3.2011, ethical research permission code R11032). Permission for the  
27 recruitment procedure was also received from the leading doctors of the targeted health centers.  
28 Participants were also asked to give their written informed consent.  
29  
30  
31  
32  
33  
34  
35

### 36 **Participants**

37  
38 Mothers and fathers were recruited for the study in the Pirkanmaa Hospital District area in Southern  
39 Finland. Altogether, 2244 parents gave their approval to receive prenatal questionnaires when they  
40 visited the maternity clinics, and 1679 (74.8%) of them gave their consent to participate in the study  
41 and returned the baseline questionnaires. The response rate at 5 years of age was 42.5% (N=714).  
42 Children with severe chronic illnesses or disabilities, e.g., Down's syndrome or Hirschsprung  
43 disease (n=7), and all twins (n=8) were excluded. The final sample included 699 children whose  
44 parents had answered the Strengths and Difficulties Questionnaire (SDQ) (18) or the Five-to-Fifteen  
45 (FTF) (19) questionnaire at the children's age of 5 years. The questionnaire at 5 years of age  
46 included SDQ and e-media usage questions and was answered by the parents of 653 children. The  
47 FTF questionnaire was answered by the parents of 668 children. In addition, the 18-months  
48 questionnaire, which included children's media usage questions at that age, was available for 585  
49 (out of 699) children. Information concerning parental sociodemographic factors such as education  
50 and number of previous children were asked prenatally and they were available for 641 children.  
51  
52  
53  
54  
55  
56

### 57 **Measures**

#### 58 **Screen time**

59  
60

1  
2  
3  
4 Parents reported the time a child spent engaging in electronic media activities at both 18 months and  
5 5 years of age. Separate questions were asked for weekday and weekend e-media use on how many  
6 hours a child watches programs (including on television or other devices), and (at 5 years) how  
7 many hours a child participates in electronic game-playing (on a computer, console devices, cell  
8 phones, tablets, or other devices).  
9  
10

11  
12 For the analyses, we first recoded all the reported electronic media use measures into minutes.  
13 Second, we calculated a weighted daily average (5/7 on weekdays and 2/7 at weekends) of the  
14 measures. At 18 months the daily average for program viewing ranged from 0 to 253 minutes. At 5  
15 years, separate measures for program viewing (range 225) and game-playing (range 182) were  
16 calculated, as well as the total screen time per day, by totaling both electronic media use measures  
17 (range 321). Finally, each of the electronic-media use measures (program viewing, game-playing,  
18 total screen time) was dichotomized using a 75 percentile cut-off to indicate those with the highest  
19 dose of e-media use: Program viewing at 18 months of age  $\geq 46$  mins per day (24.4%, n=143),  
20 program viewing at 5 years of age  $\geq 88$  mins per day (24.3%, n=161), use of electronic games at 5  
21 years of age  $\geq 45$  mins per day (19.3%, n=126), total screen time at 5 years of age  $\geq 135$  mins per  
22 day (24.6%, n=160).  
23  
24  
25  
26  
27

## 28 **Outcomes**

29  
30 Children's psychosocial symptoms were asked at the age of five years using two different parent-  
31 reported questionnaires: the FTF and the SDQ.  
32  
33

34  
35 The FTF questionnaire is tested for its validity and reliability for the identification of internalizing  
36 and externalizing symptoms in children aged five to fifteen years (19,20). The items are categorized  
37 into eight different domains and 22 subdomains, of which we used the following four subdomains:  
38 Attention and concentration difficulties, hyperactivity and impulsivity, emotional internalizing  
39 problems, and emotional externalizing problems (21).  
40  
41

42  
43 The SDQ children's questionnaire includes 25 items and five scales, with five items in each. It is a  
44 validated instrument to detect psychosocial problems in preschool-aged children (18), and is widely  
45 used for research purposes (11,16). In this research, we used four subscales: Hyperactivity,  
46 emotional problems, conduct problems, and peer problems.  
47  
48

49  
50 Children scoring in the 75<sup>th</sup> percentile or over in SDQ and FTF subscales were considered to have  
51 clinically elevated levels of psychosocial symptoms. The cut-off points for the FTF scales sum  
52 scores were: Attention and concentration problems  $\geq 6$  (26%, n=172), hyperactivity and impulsivity  
53  $\geq 6$  (27.9%, n=185), emotional internalizing problems  $\geq 2$  (22.3%, n=152), and emotional  
54 externalizing problems  $\geq 4$  (22.9%, n=152). Accordingly, the cut-off points for the SDQ scale sum  
55 scores were: Inattention-hyperactivity  $\geq 5$  (25.7%, n=171), emotional problems  $\geq 2$  (18.6%, n=124),  
56 conduct problems  $\geq 3$  (32.8%, n=218), and peer problems  $\geq 3$  (25.1%, n=167).  
57  
58  
59

## 60 **Covariates**



1  
2  
3  
4  
5  
6  
7  
8  
9  
10  
11  
12  
13  
14  
15  
16  
17  
18  
19  
20  
21  
22  
23  
24  
25  
26  
27  
28  
29  
30  
31  
32  
33  
34  
35  
36  
37  
38  
39  
40  
41  
42  
43  
44  
45  
46  
47  
48  
49  
50  
51  
52  
53  
54  
55  
56  
57  
58  
59  
60

We used child's age (years, continuous), gender, number of siblings, participation in a full-time daycare (no vs. yes), and parent's education (university vs. less) as covariates that were adjusted in the statistical analyses.

### Statistical analyses

Data was analyzed using IBM SPSS statistics version 25. Frequencies of categorical/dichotomous variables as well as means and standard deviations of the continuous study variables were calculated first (see tables 1 and 2). Then, logistic regression analyses were conducted to calculate odds ratios and their 95% confidence intervals for the associations between electronic media use at 18 months and five years of age and each of the subscales of FTF and SDQ (see tables 3 and 4). In addition to the bivariate (crude) analyses, two adjusted logistic regression models were conducted: In the first model, the child's age, gender, parents' education and screen use at 18 months of age (in the analyses at five years), and in the second, fully adjusted model, the number of siblings and information on full-time daycare participation were also added to the model.

### Results

Descriptive statistics of the sample are presented in **Table 1**. The mean age of the children in the sample was 5.7 years (SD=0.5). The sample consisted of 333 girls (n=47.6%) and 366 boys (52.4%). The majority of the children (67.7%) were in full-time daycare. Most of the parents (63.4%) had a university-level degree.

On average, at 18 months of age, children spent 32.4 (SD 31.0) minutes per day with electronic media devices. At five years the amount was 114.1 minutes (SD 50.6) per day (range 321). Program viewing (mean 80.4, SD 36.3) was more popular than the use of electronic games (mean 33.4, SD 25.9).

At 18 months, 22.7% of the children spent over 60 minutes consuming screen media each day, while at 5 years of age the percentage was 94.6%. Moreover, 66.8% of the children viewed programs for more than 60 minutes per day, whereas 10.6% of the children spent more than 60 minutes per day using electronic games.

The sample was generally normative, with low levels of emotional and behavioral symptoms. The mean scores for each of the subscales of psychosocial problems based on SDQ and FTF scales are reported in **Table 2**.

**Table 3** reports the odds ratios for the associations between electronic media use at 18 months and five years of age on each of the subscales of FTF and SDQ. Based on the results, electronic media use at 18 months had less of a negative effect than at five years of age: A high amount of screen time at 18 months was associated with an increased risk of SDQ peer problems (OR 1.59, p=0.03). The association was significant after children's age, gender, and parent's SES were adjusted (OR

1  
2  
3 1.64,  $p=0.03$ ). There was no increased risk of psychosocial problems with other subscales of FTF  
4 and SDQ.  
5  
6

7 In contrast, elevated levels of total screen time at five years of age were associated with multiple  
8 psychosocial problems: FTF attention and concentration difficulties (OR 1.88,  $p<0.01$ ),  
9 hyperactivity and impulsivity (OR 1.57,  $p=0.03$ ), internalizing symptoms (OR 1.75,  $p=0.01$ ), and  
10 externalizing symptoms (OR 1.69,  $p=0.01$ ). Moreover, it was associated with SDQ hyperactivity  
11 (OR 2.18,  $p<0.01$ ) and conduct problems (OR 1.53,  $p=0.03$ ). After fully controlling for the  
12 confounding factors, there were no other significant associations than the increased risk of FTF  
13 internalizing symptoms (OR 2.01,  $p=0.01$ ).  
14  
15  
16

17 **Table 4** presents the odds ratios for the associations between program viewing and the use of  
18 electronic games on each of the subscales of FTF and SDQ among children at five years of age. A  
19 high amount of program viewing was associated with an increased risk of psychosocial problems,  
20 while the use of electronic games seemed less problematic. Program viewing at five years of age  
21 had an association with all of the FTF subscales (OR 1.64-1.98,  $p<0.05$ ) and with SDQ  
22 hyperactivity (OR 2.43,  $p<0.01$ ) and conduct problems (OR 1.48,  $p=0.04$ ). In the fully-adjusted  
23 model, an increased risk appeared for attention and concentration difficulties (OR 1.91,  $p=0.01$ ) and  
24 hyperactivity and impulsivity (OR 1.67,  $p=0.03$ ), and with SDQ hyperactivity (OR 2.23,  $p<0.01$ ). In  
25 contrast, the use of electronic games was associated with an increased risk of SDQ hyperactivity  
26 (OR 1.65,  $p=0.02$ ) and only in the unadjusted model, while with the other subscales no increased  
27 risk appeared.  
28  
29  
30  
31  
32

### 33 Discussion

34  
35  
36 The aim of this study was to investigate the frequency of preschooler's e-media usage and the risks  
37 of high-dose e-media use on young children's psychosocial well-being. The results of our study  
38 show that 95% of preschoolers exceed the daily electronic media use recommendation of one hour,  
39 which is set by health professionals and pediatricians. Based on our results, increased screen time at  
40 five years of age was associated with a risk of multiple psychosocial symptoms, while increased  
41 levels of e-media use at 18 months had only few longitudinal associations for psychosocial  
42 symptoms at five years of age. Furthermore, high-dose use of electronic games at the age of five  
43 years seemed to be associated with fewer risks of psychosocial well-being than program viewing.  
44  
45  
46  
47

48 Based on the results of this study, preschoolers' average daily screen time is 114 minutes at five  
49 years of age. This number is almost two times higher than the recommended daily maximum  
50 amount of e-media, which is 60 minutes (4,22). Previous studies on preschoolers' e-media use  
51 conducted in Finland have reported similar results, as the total daily screen time was 111 minutes in  
52 2017 (5), while in Belgium it was 81 minutes (23) in 2018. Among American children, the total  
53 screen time in 2017 in this age group was somewhat higher: 159 minutes (2). It has been suggested  
54 that the products and usage culture of electronic media develops very rapidly in United States  
55 (2,24), whereas access to products might occur at a slower pace in other countries. This might  
56 explain why the frequency of usage among young children in the US is higher than in Europe.  
57  
58  
59  
60

1  
2  
3 We discovered that high screen use at 5 years of age was associated with a risk of multiple  
4 psychosocial problems. More precisely, elevated levels of total screen time were associated with  
5 attention and concentration difficulties, hyperactivity and impulsivity, emotional internalizing and  
6 externalizing symptoms, and conduct problems. Similar results have been recently reported on  
7 emotional symptoms (11,16,25), conduct problems, and hyperactivity (25). Previous studies have  
8 also reported associations between increased total screen time and peer problems (25). We did not  
9 find such associations at five years. This difference might be explained by the age of the  
10 participants: In the study of Wu et al. (2017) the mean age of the participants was 4.37, whereas in  
11 our study it was 5.68. In line with this, our findings show that screen time at an earlier age, i.e., at  
12 18 months, was associated with peer problems later on. It seems that a high amount of screen use at  
13 a younger age is a risk factor for peer problems. However, unlike some other studies (10,11,16), we  
14 did not find high-dose use of electronic devices at 18 months of age to be associated with other  
15 problems in psychosocial well-being later on. It is feasible that parents regulate younger children's  
16 e-media usage habits, while later on, other factors such as a child's personality traits or their  
17 participation in daycare may have a more important role in the amount of usage.  
18  
19  
20  
21  
22  
23

24 Our results show that an increased amount of program viewing at 5 years of age is associated with a  
25 risk of several psychosocial problems, while electronic game use had fewer associations, which  
26 is also consistent with recent previous studies (11,15,16). Electronic game-playing was  
27 only associated with SDQ hyperactivity, whereas no risks were found regarding other psychosocial  
28 symptoms. Previous studies have yielded an association between electronic game-playing and  
29 emotional symptoms. However, the direction of the association is contradictory: Increased e-game  
30 use has been associated with emotional problems (16), but also with better socioemotional skills  
31 (15). The few associations between socioemotional health and game-playing might be explained by  
32 the social nature of game-playing: Children often participate in the use of e-games with siblings and  
33 other family members, for example, and develop their social and emotional skills in these social  
34 interactions (15). All in all, the amount of daily e-game usage in our study and all of these other  
35 studies was much lower compared to program viewing, which might explain why e-games are not  
36 associated with psychosocial problems to any larger extent at this age.  
37  
38  
39  
40  
41  
42

43 As our results point out, increased screen time has multiple risks for children's psychosocial well-  
44 being. These risk factors might accumulate in the long-term, and cause problems in children's  
45 socio-emotional development later on. Health professionals and pediatricians play an important role  
46 as communicators of the current research results on the safe usage of e-media for families. Parents'  
47 knowledge might further help them to set safe boundaries for young children's e-media use and  
48 protect children's psychosocial health from associated risk factors (26).  
49  
50  
51

52 One possible mechanism accounting for the result might be that the time children spend on e-media  
53 reduces the time spend on constructive activities, such as interactions with family members, reading  
54 and playing (1,8,9). At an early age, children's socio-emotional development occurs in a dynamic  
55 interplay between social learning and environmental factors. Furthermore, if the surrounding  
56 environment does not offer enough means for a child's healthy development, it might affect a  
57 children's psychosocial well-being (27). Genetic dispositions also play a role in modifying  
58 individual risks. However, the direction of the effect of e-media use is unclear, as some parents  
59  
60

1  
2  
3 might use e-media devices as a tool to calm their children down, especially when the child has  
4 socio-emotional difficulties (6).  
5  
6

7 One strength of our study is its longitudinal study setting and its repeated measurement of e-media  
8 exposure. Moreover, patterns of children's electronic media usage are rapidly changing, and our  
9 study offers results on the associations between young children's e-media use and their  
10 psychosocial well-being based on recent data. In addition, the sample is based on a representative  
11 birth cohort recruited during pregnancy and therefore it is not affected by selection bias, although  
12 those with lower education seem to be underrepresented in the sample, as do single mothers (17).  
13 The measurement of e-media use was based on parental questionnaires and not logs, such as in the  
14 previous similar study (5). However, the reported exposures are very much in line with previous  
15 studies and therefore this seems to have a negligible influence on the findings. In the future, more  
16 research is needed on the family conditions of high-dose e-media users.  
17  
18  
19  
20

## 21 **Conclusion**

22  
23  
24 This study reported the risks associated with high-dose use of electronic media devices by young  
25 children. Our results show that 5-year-old children spend considerably more time on e-media than is  
26 recommended by professionals. Our results further indicate that high levels of e-media use,  
27 especially program viewing, is associated with problems with psychosocial outcomes, while e-  
28 games play a lesser role among five-year-olds. Children's social-emotional development is  
29 influenced by environmental factors, including electronic media habits. Although children's  
30 electronic media use patterns might not seem problematic when considering use on a daily level,  
31 they do have risks in the long term. Thus, health professionals play a key role in providing  
32 information for parents on screen media parenting, i.e., the safe use of e-media devices among  
33 young children in order to protect their healthy development.  
34  
35  
36  
37  
38

## 39 **Acknowledgement**

40  
41 The authors would like to thank all the families that participated in the CHILD-SLEEP and  
42 Finnbrain birth cohorts. The authors are also grateful for the nurses at the maternity clinics who  
43 introduced the study to the families.  
44  
45  
46

## 47 **Contributorship statement**

48  
49 EJP and OSH designed the study. JN, OK, and EJP were primarily responsible for data analysis and  
50 writing of the article. RV and AK contributed critically to the writing of the article.  
51

## 52 **Competing interests**

53  
54 The authors declare no competing interests.  
55  
56

## 57 **Funding**

58  
59  
60

1  
2  
3  
4  
5  
6  
7  
8  
9  
10  
11  
12  
13  
14  
15  
16  
17  
18  
19  
20  
21  
22  
23  
24  
25  
26  
27  
28  
29  
30  
31  
32  
33  
34  
35  
36  
37  
38  
39  
40  
41  
42  
43  
44  
45  
46  
47  
48  
49  
50  
51  
52  
53  
54  
55  
56  
57  
58  
59  
60

This work was supported by The Academy of Finland (#308588, #277557), the Signe and Ane Gyllenberg foundation, the Yrjö Jahnsson Foundation, the Foundation for Pediatric Research, the Finnish Cultural Foundation, the Competitive Research Financing of the Expert Responsibility area of Tampere University Hospital, and Doctors' Association in Tampere.

### **Data sharing statement**

Data is not publicly available due to legal restrictions and confidential nature of the data. Data is available upon request. Requests may be sent to The Finnish Institute for Health and Welfare, who is the controller of the data. For more information about data access, please see

<https://thl.fi/en/web/thlfi-en/statistics/information-for-researchers>.

For peer review only

## References

1. Radesky JS. Increase in Screen Time Implications for Early Childhood Development and Behavior. *BMJ Open*. 2016;63:827–39.
2. Rideout V. “The common sense census: Media use by kids age zero to eight.” San Francisco, CA; 2017.
3. Kabali HK, Irigoyen MM, Nunez-Davis R, Budacki JG, Mohanty SH, Leister KP, et al. Exposure and use of mobile media devices by young children. *Pediatrics*. 2015;136(6):1044–50.
4. WHO. Guidelines on physical activity, sedentary behaviour and sleep for children under 5 years of age. World Health Organization. 2019. 33 p.
5. Määttä S, Konttinen H, Haukkala A, Erkkola M, Roos E. Preschool children’s context-specific sedentary behaviours and parental socioeconomic status in Finland: A cross-sectional study. *BMJ Open*. 2017;7(11):1–10.
6. Radesky JS, Peacock-Chambers E, Zuckerman B, Silverstein M. Use of mobile technology to calm upset children: Associations with social-emotional development. *JAMA Pediatr*. 2016;170(4):397–9.
7. Paudel S, Jancey J, Subedi N, Leavy J. Correlates of mobile screen media use among children aged 0-8: A systematic review. *BMJ Open*. 2017;7(10):1–12.
8. Gerwin RL, Kaliebe K, Daigle M. The Interplay Between Digital Media Use and Development. *Child Adolesc Psychiatr Clin N Am*. 2018;27(2):345–55.
9. Christakis DA, Gilkerson J, Richards JA, Zimmerman FJ, Garrison MM, Xu D, et al. Audible television and decreased adult words, infant vocalizations, and conversational turns: A population-based study. *Arch Pediatr Adolesc Med*. 2009;163(6):554–8.
10. Christakis DA, Zimmerman FJ, DiGiuseppe DL, McCarty CA. Early Television Exposure and Subsequent Attentional Problems in Children. *Pediatrics*. 2004;113(4 I):708–13.
11. McNeill J, Howard SJ, Vella SA, Cliff DP. Longitudinal Associations of Electronic Application Use and Media Program Viewing with Cognitive and Psychosocial Development in Preschoolers. *Acad Pediatr*. 2019;19(5):520–8.
12. Wu X, Tao S, Rutayisire E, Chen Y, Huang K, Tao F. The relationship between screen time, nighttime sleep duration, and behavioural problems in preschool children in China. *Eur Child Adolesc Psychiatry*. 2017;26(5):541–8.
13. Manganello JA, Taylor CA. Television exposure as a risk factor for aggressive behavior among 3-year-old children. *Arch Pediatr Adolesc Med*. 2009;163(11):1037–45.
14. Pagani LS, Fitzpatrick C, Barnett TA, Dubow E. Prospective associations between early childhood television exposure and academic, psychosocial, and physical well-being by middle childhood. *Arch Pediatr Adolesc Med*. 2010;164(5):425–31.
15. Hinkley T, Timperio A, Salmon J, Hesketh AK. Does preschool physical activity and electronic media use predict later social and emotional skills at 6 to 8 years? A cohort study. *J Phys Act Heal*. 2017;14(4):308–16.
16. Hinkley T, Verbestel V, Ahrens W, Lissner L, Molnar D, Moreno LA, et al. Early childhood electronic media use as a predictor of poorer well-being: a prospective cohort study. *JAMA Pediatr*. 2014;168(5):485–92.
17. Paavonen JE, Saarenpää-Heikkilä O, Pölkki P, Kylliäinen A, Porkka-Heiskanen T, Paunio T. Maternal and paternal sleep during pregnancy in the Child-sleep birth cohort. *Sleep Med*. 2017;29:47–56.
18. Theunissen MHC, Vogels AGC, De Wolff MS, Reijneveld SA. Characteristics of the strengths and difficulties questionnaire in preschool children. *Pediatrics*. 2013;131(2):3–4.
19. Korkman M, Jaakkola M, Ahlroth A, Pesonen AE, Turunen MM. Screening of developmental disorders in five-year-olds using the FTF (Five to Fifteen) questionnaire: A validation study. *Eur Child Adolesc Psychiatry, Suppl*. 2004;13(3):31–8.
20. Bohlin G, Janols LO. Behavioural problems and psychiatric symptoms in 5-13 year-old Swedish children - A comparison of parent ratings on the FTF (Five to Fifteen) with the ratings on CBCL (Child Behavior Checklist). *Eur Child Adolesc Psychiatry, Suppl*. 2004;13(3):14–22.
21. Kadesjö B, Janols LO, Korkman M, Mickelsson K, Strand G, Trillingsgaard A, et al. The FTF (Five to Fifteen): The development of a parent questionnaire for the assessment of ADHD and comorbid conditions. *Eur Child Adolesc Psychiatry, Suppl*. 2004;13(3):3–13.
22. American Academy of Pediatrics. American Academy of Pediatrics Announces New Recommendations for

1  
2  
3  
4  
5  
6  
7  
8  
9  
10  
11  
12  
13  
14  
15  
16  
17  
18  
19  
20  
21  
22  
23  
24  
25  
26  
27  
28  
29  
30  
31  
32  
33  
34  
35  
36  
37  
38  
39  
40  
41  
42  
43  
44  
45  
46  
47  
48  
49  
50  
51  
52  
53  
54  
55  
56  
57  
58  
59  
60

Children's Media Use. 2016.

23. De Craemer M, McGregor D, Androustos O, Manios Y, Cardon G. Compliance with 24-h movement behaviour guidelines among belgian pre-school children: The toybox-study. *Int J Environ Res Public Health*. 2018;15(10):1–10.
24. Vandewater EA, Rideout VJ, Wartella EA, Huang X, Lee JH, Shim MS. Digital childhood: Electronic media and technology use among infants, toddlers, and preschoolers. *Pediatrics*. 2007;119(5).
25. Wu X, Tao S, Rutayisire E, Chen Y, Huang K, Tao F. The relationship between screen time, nighttime sleep duration, and behavioural problems in preschool children in China. *Eur Child Adolesc Psychiatry*. 2017;26(5):541–8.
26. Connor TMO, Hingle M, Chuang R, Gorely T, Hinkley T, Jago R, et al. Conceptual Understanding of Screen Media Parenting: Report of a Working Group. 2013;9(8):110–9.
27. Feldman R, Eidelman AI. Biological and environmental initial conditions shape the trajectories of cognitive and social-emotional development across the first years of life. *Dev Sci*. 2009;12(1):194–200.

For peer review only

Table 1. Descriptive statistics of sociodemographic factors and measures of screen time (N=699)

|                                                           | % (N)               |
|-----------------------------------------------------------|---------------------|
| <b>Sociodemographic factors</b>                           |                     |
| Child's gender                                            |                     |
| Girls                                                     | 47.6 (333)          |
| Boys                                                      | 52.4 (366)          |
| Child's age, years; mean (SD)                             | 5.68 (0.54)         |
| Parent's education                                        |                     |
| University-level degree                                   | 63.4 (409)          |
| Less than university-level degree                         | 36.6 (236)          |
| Number of siblings                                        |                     |
| 0                                                         | 51.0 (327)          |
| 1                                                         | 32.2 (207)          |
| 2                                                         | 12.9 (83)           |
| 3                                                         | 2.5 (16)            |
| 4 or more                                                 | 1.2 (8)             |
| Full-time daycare                                         |                     |
| No                                                        | 32.3 (214)          |
| Yes                                                       | 67.7 (448)          |
| <b>Screen time</b>                                        |                     |
| Total screen time at 18 months, min; mean (SD), range     | 32.4 (31.0), 252.9  |
| Over 60 minutes, %                                        | 22.7 (136)          |
| Over 120 minutes, %                                       | 2.8 (17)            |
| Program viewing at 5 years, min; mean (SD), range         | 80.4 (36.3), 225.0  |
| Over 60 minutes, %                                        | 66.8 (442)          |
| Over 120 minutes, %                                       | 16.9 (112)          |
| Electronic game-playing at 5 years, min; mean (SD), range | 33.4 (25.9), 182.1  |
| Over 60 minutes, %                                        | 10.6 (69)           |
| Over 120 minutes, %                                       | 2.3 (15)            |
| Total screen time at 5 years, min; mean (SD), range       | 114.1 (50.6), 321.4 |
| Over 60 minutes, %                                        | 94.6 (615)          |
| Over 120 minutes, %                                       | 40.2 (261)          |
| Over 180 minutes, %                                       | 11.5 (75)           |



1  
2  
3  
4  
5  
6  
7  
8  
9  
10  
11  
12  
13  
14  
15  
16  
17  
18  
19  
20  
21  
22  
23  
24  
25  
26  
27  
28  
29  
30  
31  
32  
33  
34  
35  
36  
37  
38  
39  
40  
41  
42  
43  
44  
45  
46  
47  
48  
49  
50  
51  
52  
53  
54  
55  
56  
57  
58  
59  
60

Table 2. Outcome variables.

| Outcome variable                         | Mean (SD)   | Range |
|------------------------------------------|-------------|-------|
| FTF                                      |             |       |
| Attention and concentration difficulties | 3.75 (3.41) | 18.00 |
| Hyperactivity and impulsivity            | 3.98 (3.63) | 18.00 |
| Emotional/internalizing symptoms         | 1.52 (1.79) | 15.00 |
| Emotional/externalizing symptoms         | 2.83 (3.25) | 21.00 |
| SDQ                                      |             |       |
| Hyperactivity                            | 3.04 (2.34) | 10.00 |
| Emotional problems                       | 1.38 (1.48) | 9.00  |
| Conduct problems                         | 1.97 (1.59) | 9.00  |
| Peer problems                            | 1.69 (1.38) | 9.00  |

Table 3. Associations between electronic media use at 18 months and 5 years of age with psychosocial well-being.

| <i>Screen time: 18 months of age</i>     | <i>Crude</i> |                  |                 | <i>Adjusted 1<sup>a</sup></i> |                  |             | <i>Adjusted 2<sup>b</sup></i> |                  |             |
|------------------------------------------|--------------|------------------|-----------------|-------------------------------|------------------|-------------|-------------------------------|------------------|-------------|
|                                          | <i>OR</i>    | <i>95% CI</i>    | <i>p</i>        | <i>OR</i>                     | <i>95% CI</i>    | <i>p</i>    | <i>OR</i>                     | <i>95% CI</i>    | <i>p</i>    |
| <b>FTF</b>                               |              |                  |                 |                               |                  |             |                               |                  |             |
| Attention and concentration difficulties | 1.46         | 0.96-2.22        | 0.07            | 1.50                          | 0.97-2.31        | 0.07        | 1.41                          | 0.89-2.22        | 0.14        |
| Hyperactivity and impulsivity            | 1.16         | 0.76-1.77        | 0.50            | 1.16                          | 0.75-1.81        | 0.50        | 1.14                          | 0.72-1.80        | 0.59        |
| Emotional/internalizing symptoms         | 1.19         | 0.76-1.88        | 0.45            | 1.15                          | 0.72-1.85        | 0.55        | 1.13                          | 0.69-1.86        | 0.62        |
| Emotional/externalizing symptoms         | 1.03         | 0.66-1.60        | 0.91            | 1.04                          | 0.65-1.65        | 0.88        | 1.06                          | 0.65-1.72        | 0.82        |
| <b>SDQ</b>                               |              |                  |                 |                               |                  |             |                               |                  |             |
| Hyperactivity                            | 1.49         | 0.98-2.26        | 0.06            | 1.37                          | 0.89-2.12        | 0.15        | 1.37                          | 0.87-2.18        | 0.18        |
| Emotional problems                       | 1.36         | 0.86-2.17        | 0.19            | 1.38                          | 0.85-2.23        | 0.19        | 1.47                          | 0.88-2.45        | 0.14        |
| Conduct problems                         | 1.24         | 0.84-1.84        | 0.28            | 1.26                          | 0.84-1.90        | 0.27        | 1.23                          | 0.80-1.90        | 0.35        |
| Peer problems                            | <b>1.59</b>  | <b>1.04-2.41</b> | <b>0.03</b>     | <b>1.64</b>                   | <b>1.06-2.52</b> | <b>0.03</b> | 1.56                          | 0.98-2.46        | 0.06        |
| <b>Total screen time: 5 years of age</b> |              |                  |                 |                               |                  |             |                               |                  |             |
| <b>FTF</b>                               |              |                  |                 |                               |                  |             |                               |                  |             |
| Attention and concentration difficulties | <b>1.88</b>  | <b>1.27-2.80</b> | <b>&lt;0.01</b> | 1.45                          | 0.92-2.28        | 0.11        | 1.57                          | 0.97-2.53        | 0.07        |
| Hyperactivity and impulsivity            | <b>1.57</b>  | <b>1.06-2.33</b> | <b>0.03</b>     | 1.33                          | 0.85-2.12        | 0.22        | 1.31                          | 0.81-2.13        | 0.28        |
| Emotional/internalizing symptoms         | <b>1.75</b>  | <b>1.15-2.65</b> | <b>0.01</b>     | <b>1.84</b>                   | <b>1.14-2.97</b> | <b>0.01</b> | <b>2.01</b>                   | <b>1.21-3.34</b> | <b>0.01</b> |
| Emotional/externalizing symptoms         | <b>1.69</b>  | <b>1.12-2.55</b> | <b>0.01</b>     | 1.39                          | 0.87-2.23        | 0.17        | 1.54                          | 0.94-2.52        | 0.09        |
| <b>SDQ</b>                               |              |                  |                 |                               |                  |             |                               |                  |             |
| Hyperactivity                            | <b>2.18</b>  | <b>1.49-3.20</b> | <b>&lt;0.01</b> | <b>1.60</b>                   | <b>1.02-2.49</b> | <b>0.04</b> | 1.55                          | 0.97-2.48        | 0.07        |
| Emotional problems                       | 0.99         | 0.62-1.56        | 0.95            | 0.98                          | 0.58-1.66        | 0.94        | 0.90                          | 0.49-1.61        | 0.70        |
| Conduct problems                         | <b>1.53</b>  | <b>1.05-2.21</b> | <b>0.03</b>     | 1.24                          | 0.81-1.91        | 0.32        | 1.06                          | 0.67-1.67        | 0.80        |
| Peer problems                            | 1.06         | 0.71-1.60        | 0.77            | 0.90                          | 0.56-1.45        | 0.67        | 0.85                          | 0.51-1.42        | 0.53        |

<sup>a</sup> Adjusted for age, gender, parent's education. Total screen time at 5 years of age: Also adjusted for screen time at 18 months of age.

<sup>b</sup> Adjusted for age, gender, parent's education, number of siblings, and daycare participation. Total screen time at 5 years of age: Also adjusted for screen time at 18 months of age.

Table 4. Associations between program viewing and use of electronic games at 5 years of age with psychosocial well-being.

| <i><b>Program viewing: 5 years of age</b></i>         | <i><b>Crude</b></i> |                      |                 | <i><b>Adjusted 1<sup>a</sup></b></i> |                      |                 | <i><b>Adjusted 2<sup>b</sup></b></i> |                      |                 |
|-------------------------------------------------------|---------------------|----------------------|-----------------|--------------------------------------|----------------------|-----------------|--------------------------------------|----------------------|-----------------|
|                                                       | <i><b>OR</b></i>    | <i><b>95% CI</b></i> | <i><b>p</b></i> | <i><b>OR</b></i>                     | <i><b>95% CI</b></i> | <i><b>p</b></i> | <i><b>OR</b></i>                     | <i><b>95% CI</b></i> | <i><b>p</b></i> |
| <b>FTF</b>                                            |                     |                      |                 |                                      |                      |                 |                                      |                      |                 |
| Attention and concentration difficulties              | <b>1.98</b>         | <b>1.34-2.93</b>     | <b>&lt;0.01</b> | <b>1.71</b>                          | <b>1.10-2.69</b>     | <b>0.02</b>     | <b>1.91</b>                          | <b>1.19-3.08</b>     | <b>0.01</b>     |
| Hyperactivity and impulsivity                         | <b>1.64</b>         | <b>1.11-2.42</b>     | <b>0.01</b>     | <b>1.68</b>                          | <b>1.07-2.63</b>     | <b>0.02</b>     | <b>1.67</b>                          | <b>1.04-2.69</b>     | <b>0.03</b>     |
| Emotional/internalizing symptoms                      | <b>1.68</b>         | <b>1.11-2.54</b>     | <b>0.01</b>     | 1.59                                 | 0.99-2.55            | 0.06            | <b>1.71</b>                          | <b>1.03-2.84</b>     | <b>0.04</b>     |
| Emotional/externalizing symptoms                      | <b>1.69</b>         | <b>1.12-2.55</b>     | <b>0.01</b>     | 1.14                                 | 0.71-1.84            | 0.59            | 1.19                                 | 0.72-1.96            | 0.50            |
| <b>SDQ</b>                                            |                     |                      |                 |                                      |                      |                 |                                      |                      |                 |
| Hyperactivity                                         | <b>2.43</b>         | <b>1.66-3.56</b>     | <b>&lt;0.01</b> | <b>2.29</b>                          | <b>1.47-3.55</b>     | <b>&lt;0.01</b> | <b>2.23</b>                          | <b>1.40-3.54</b>     | <b>&lt;0.01</b> |
| Emotional problems                                    | 0.99                | 0.63-1.56            | 0.97            | 0.94                                 | 0.56-1.57            | 0.80            | 0.86                                 | 0.48-1.53            | 0.60            |
| Conduct problems                                      | <b>1.49</b>         | <b>1.03-2.15</b>     | <b>0.04</b>     | 1.31                                 | 0.85-2.00            | 0.22            | 1.16                                 | 0.74-1.82            | 0.51            |
| Peer problems                                         | 1.04                | 0.69-1.56            | 0.86            | 0.93                                 | 0.58-1.50            | 0.77            | 0.87                                 | 0.52-1.44            | 0.58            |
| <i><b>Use of electronic games: 5 years of age</b></i> |                     |                      |                 |                                      |                      |                 |                                      |                      |                 |
| <b>FTF</b>                                            |                     |                      |                 |                                      |                      |                 |                                      |                      |                 |
| Attention and concentration difficulties              | 0.95                | 0.60-1.51            | 0.82            | 0.69                                 | 0.41-1.16            | 0.16            | 0.67                                 | 0.38-1.17            | 0.16            |
| Hyperactivity and impulsivity                         | 1.20                | 0.77-1.87            | 0.42            | 0.89                                 | 0.54-1.48            | 0.66            | 0.82                                 | 0.48-1.42            | 0.48            |
| Emotional/internalizing symptoms                      | 1.22                | 0.76-1.96            | 0.40            | 1.27                                 | 0.75-2.16            | 0.38            | 1.36                                 | 0.78-2.40            | 0.28            |
| Emotional/externalizing symptoms                      | 1.37                | 0.86-2.16            | 0.19            | 1.23                                 | 0.74-2.05            | 0.42            | 1.42                                 | 0.83-2.42            | 0.20            |
| <b>SDQ</b>                                            |                     |                      |                 |                                      |                      |                 |                                      |                      |                 |
| Hyperactivity                                         | <b>1.65</b>         | <b>1.08-2.51</b>     | <b>0.02</b>     | 1.06                                 | 0.65-1.72            | 0.81            | 0.98                                 | 0.58-1.66            | 0.95            |
| Emotional problems                                    | 0.95                | 0.58-1.58            | 0.85            | 1.10                                 | 0.63-1.92            | 0.75            | 1.04                                 | 0.55-1.97            | 0.90            |
| Conduct problems                                      | 1.04                | 0.69-1.57            | 0.85            | 0.88                                 | 0.55-1.40            | 0.58            | 0.75                                 | 0.50-1.25            | 0.27            |
| Peer problems                                         | 1.10                | 0.71-1.70            | 0.69            | 0.87                                 | 0.52-1.46            | 0.60            | 0.83                                 | 0.48-1.44            | 0.51            |

<sup>a</sup> Adjusted for age, gender, parent’s education, screen time at 18 months of age.

<sup>b</sup> Adjusted for age, gender, parent’s education, siblings, and daycare participation, screen time at 18 months of age.

# BMJ Open

## Preschoolers' high-dose electronic media use and its association with their psychosocial well-being at five years of age

|                                 |                                                                                                                                                                                                                                                                                                                                                                        |
|---------------------------------|------------------------------------------------------------------------------------------------------------------------------------------------------------------------------------------------------------------------------------------------------------------------------------------------------------------------------------------------------------------------|
| Journal:                        | <i>BMJ Open</i>                                                                                                                                                                                                                                                                                                                                                        |
| Manuscript ID                   | bmjopen-2020-040848.R1                                                                                                                                                                                                                                                                                                                                                 |
| Article Type:                   | Original research                                                                                                                                                                                                                                                                                                                                                      |
| Date Submitted by the Author:   | 12-Nov-2020                                                                                                                                                                                                                                                                                                                                                            |
| Complete List of Authors:       | Niiranen, Janette; Finnish Institute for Health and Welfare, Department of Public Health Solutions<br>Kiviruusu, Olli; Finnish Institute for Health and Welfare<br>Vornanen, Riitta; University of Eastern Finland - Kuopio Campus<br>Saarenpää-Heikkilä, Outi; University of Tampere, Pediatric Clinics<br>Paavonen, Juulia; Finnish Institute for Health and Welfare |
| <b>Primary Subject Heading</b>: | Paediatrics                                                                                                                                                                                                                                                                                                                                                            |
| Secondary Subject Heading:      | Epidemiology, Mental health                                                                                                                                                                                                                                                                                                                                            |
| Keywords:                       | EPIDEMIOLOGY, Community child health < PAEDIATRICS, Child & adolescent psychiatry < PSYCHIATRY                                                                                                                                                                                                                                                                         |
|                                 |                                                                                                                                                                                                                                                                                                                                                                        |

SCHOLARONE™  
Manuscripts



I, the Submitting Author has the right to grant and does grant on behalf of all authors of the Work (as defined in the below author licence), an exclusive licence and/or a non-exclusive licence for contributions from authors who are: i) UK Crown employees; ii) where BMJ has agreed a CC-BY licence shall apply, and/or iii) in accordance with the terms applicable for US Federal Government officers or employees acting as part of their official duties; on a worldwide, perpetual, irrevocable, royalty-free basis to BMJ Publishing Group Ltd ("BMJ") its licensees and where the relevant Journal is co-owned by BMJ to the co-owners of the Journal, to publish the Work in this journal and any other BMJ products and to exploit all rights, as set out in our [licence](#).

The Submitting Author accepts and understands that any supply made under these terms is made by BMJ to the Submitting Author unless you are acting as an employee on behalf of your employer or a postgraduate student of an affiliated institution which is paying any applicable article publishing charge ("APC") for Open Access articles. Where the Submitting Author wishes to make the Work available on an Open Access basis (and intends to pay the relevant APC), the terms of reuse of such Open Access shall be governed by a Creative Commons licence – details of these licences and which [Creative Commons](#) licence will apply to this Work are set out in our licence referred to above.

Other than as permitted in any relevant BMJ Author's Self Archiving Policies, I confirm this Work has not been accepted for publication elsewhere, is not being considered for publication elsewhere and does not duplicate material already published. I confirm all authors consent to publication of this Work and authorise the granting of this licence.

1  
2  
3 Preschoolers' high-dose electronic media use and its association with their  
4 psychosocial well-being at five years of age  
5  
6  
7  
8

9 Niiranen J<sup>1</sup>, Kiviruusu O<sup>1</sup>, Vornanen R<sup>2</sup>, Saarenpää-Heikkilä O<sup>3,4</sup>, Paavonen EJ<sup>1,5</sup>.  
10  
11  
12  
13  
14  
15  
16

17 1 Department of Public Health Solutions, Finnish Institute for Health and Welfare, Helsinki,  
18 Finland  
19

20 2 University of Eastern Finland, Department of Social Sciences, Kuopio, Finland

21 3 Pediatric Clinics, Tampere University Hospital, Tampere, Finland

22 4 Tampere Centre for Child Health Research, University of Tampere and Tampere University  
23 Hospital, Tampere, Finland  
24

25 5 Pediatric Research Center, Child Psychiatry, University of Helsinki and Helsinki University  
26 Hospital, Helsinki, Finland  
27  
28

29 **Correspondence to**

30  
31 juulia.paavonen@helsinki.fi  
32  
33  
34  
35  
36  
37  
38  
39  
40  
41  
42  
43  
44  
45  
46  
47  
48  
49  
50  
51  
52  
53  
54  
55  
56  
57  
58  
59  
60

## Abstract

**Objectives** This study investigated the frequency of preschooler's electronic media (e-media) usage and the risks of high-dose e-media use on young children's psychosocial well-being.

**Design** We study longitudinal associations between e-media use at 18 months and psychosocial symptoms at five years of age, as well as cross-sectional associations between e-media use and psychosocial symptoms at five years.

**Setting** Between 2011 and 2017 in Finland.

**Participants** Children aged 5 years (N=699).

**Primary and secondary outcome measures** Children's psychosocial symptoms were asked at the age of five years using the parent-reported questionnaires Five-to-Fifteen (FTF) and the Strengths and Difficulties Questionnaire (SDQ).

**Results** Based on our results, 95% of the preschoolers exceed the daily electronic media use recommendation set by health professionals. Our results indicate that increased screen time at five years of age is associated with a risk of multiple psychosocial symptoms (OR 1.53-2.18, 95% CI: 1.05-3.20,  $p<0.05$ ), while increased levels of e-media use at 18 months was only associated with FTF peer problems (OR 1.59, CI: 1.04-2.41,  $p=0.03$ ). Moreover, high-dose use of electronic games at the age of five years seems to be associated with fewer risks for psychosocial well-being than program viewing, as it was only associated with SDQ hyperactivity (OR 1.65, CI 1.49-3.20,  $p=0.02$ ).

**Conclusion** Increased screen time has multiple risks for children's psychosocial well-being. These risk factors seem to be significant in the long term, and cause problems in children's socio-emotional development later on. Health professionals and pediatricians have an important role as communicators of the current research results on the safe usage time of e-media for families, and enhance parents' skills as regulators of children's safe e-media use. In the future, more research is needed on the family conditions of high-dose e-media users.

### Strengths and limitations of this study

- A major strength of our study is the longitudinal study setting and repeated measurement of e-media exposure.
- Additionally, patterns of children's electronic media use are rapidly changing, and our study offers results on the associations of young children's e-media usage with their psychosocial well-being based on recent data.
- The limitation of our study is the measurement of e-media use that was based on parental questionnaires and not logs.
- Moreover, the sample is based on a representative birth cohort recruited during pregnancy. However, those with lower education seem to be underrepresented in the sample, as are single mothers.

**Keywords:** Child psychiatry, child psychiatric epidemiology, pediatrics, child mental health, child development, e-media

## Introduction

In recent years, as digital technology has rapidly developed, electronic media (e-media) has become an almost universal part of young children's daily life. Even at preschool age, e-media use is already a popular sedentary behavior (1). Traditional e-media is often used: nearly half of preschool-age children watch TV (2), use a laptop or desktop computer, and play video consoles daily (3). However, the pattern of how media is used has changed considerably in recent years, as preschool children's use of mobile devices has tripled from 2013 to 2017, although the overall amount of e-media use has remained relatively stable (2). Recent studies also report that a large proportion (81.3%) of 4-year-old children play games, use applications, or watch videos on mobile devices daily (3).

Electronic media use (i.e. total screen time) comprises program viewing (i.e. watching of programs from TV, DVDs, mobile devices), as well as use of social media, internet and e-games. While the negative forms of e-media use (e.g., playing e-games alone), are often emphasized, the healthier forms also exist. A reasonable amount of educational electronic media material (e.g., serious games) might have beneficial effects on young children's psychosocial well-being and development (4). Moreover, e-media use involving social interactions, such as use with caregivers might be having fewer risks than the use alone, as parents can help the children to understand what they are seeing (5). Use of e-games with siblings and peers seems also to be less risky (6).

High dose use of e-media in young children can be a risk factor for the development of a child. Studies suggest that frequent e-media use in family households might interrupt parent-child interaction, which might cause problems in children's social-emotional development (1,4,7-9). Thus, high dose use of e-media can also be related to the development of a child, such as language development (10) or development of social skills (11), which are important to the children's psychosocial health. High-dose use can also develop to a behavioral addiction. While studied less among children, according to a recent study, internet- or screen-based behavioral addictions appear as a child's persistent requests to access e-media, and parents' unsuccessful attempts to control the use. It might cause problems with family members, such as parents and siblings, and lead to a loss of a child's previous hobbies and interests (12).

The World Health Organization (WHO) has published guidelines for the total screen time of children aged 2-4. The recommendation is a maximum of one hour per day for this age group (13). However, in previous studies, much higher amounts have been reported. For example, among American children aged 2-4, the average total screen time per day was 159 minutes (2), and among Finnish children aged 3-6 it was 111 min (14). It seems that parents may be unaware of the potential risks of high-dose e-media usage for their children's psychosocial well-being. Studies have even pointed out that some parents use e-media devices as a tool to calm down their children, especially when the child has social emotional difficulties (15-18). Thus, the link between e-media use and psychosocial symptoms seems to be bidirectional.



1  
2  
3 Based on the research, it seems that a high amount of program viewing is a risk for preschool-age  
4 children's psychosocial well-being (4). It is associated with externalizing problems, such as  
5 hyperactivity (8,19) and conduct problems (19–21), and also with peer problems (22). However,  
6 fewer studies have investigated the associations between electronic game-playing and preschool-age  
7 children's psychosocial well-being (6,19,23). According to these studies, it seems that electronic  
8 game-playing might be less detrimental and may even have some positive effects on children's  
9 socio-emotional skills (6). Nonetheless, the use of electronic games and computers are associated  
10 with internalizing problems, such as emotional problems (23).  
11  
12  
13  
14

15 As the patterns of children's electronic media usage are rapidly changing, the updated data on the  
16 degree of e-media usage and its significance on well-being is needed. Moreover, although there is  
17 evidence showing the harmful effects of preschool-age children's high-dose e-media use on their  
18 well-being, few of these studies have analyzed the longitudinal associations of early exposure of e-  
19 media to children's later psychosocial problems. According to these studies it seems that high-dose  
20 e-media use that starts at early age might be detrimental for young children's psychosocial health  
21 later on (8,19,23).  
22  
23  
24

25 The aim of this research is to assess the amount of preschooler's e-media usage and its associations  
26 with their psychosocial well-being. We study longitudinal associations between e-media use at 18  
27 months and psychosocial symptoms at five years of age, as well as cross-sectional associations  
28 between e-media use (program viewing and electronic game-playing) and psychosocial symptoms  
29 at five years. Psychosocial symptoms, i.e., internalizing and externalizing problems and inattention,  
30 were assessed at five years of age. We hypothesized that children who consume large amounts of e-  
31 media at 18 months of age have more psychosocial symptoms at five years than those who use less.  
32 Moreover, we hypothesized that program viewing is associated with more problems in psychosocial  
33 health, while use of e-games has less associations with negative outcomes.  
34  
35  
36  
37  
38

## 39 **Method**

### 40 **Study design**

41 This study is part of a larger Finnish CHILD-SLEEP longitudinal birth cohort study, which includes  
42 several measurement points. The study design, protocol, participants, and measures have been  
43 described in more detail in Paavonen et al. (24). The recruitment and baseline measurement took  
44 place prenatally at the 32nd week and the follow-up measurements occurred at the birth of the child  
45 and at three, eight, 18, 24 and 60 months of age. Moreover, records from the maternity hospital and  
46 maternity clinics were collated. The study protocol was approved by the local Hospital District  
47 Ethical Committee (9.3.2011, ethical research permission code R11032). Permission for the  
48 recruitment procedure was also received from the leading doctors of the targeted health centers.  
49 Participants were also asked to give their written informed consent. Participation to the study was  
50 voluntary, and the families received no compensation for the participation.  
51  
52  
53  
54  
55  
56  
57  
58

### 59 **Participants**

1  
2  
3 Mothers and fathers were recruited for the study in the Pirkanmaa Hospital District area in Southern  
4 Finland. Altogether, 2244 parents gave their approval to receive prenatal questionnaires when they  
5 visited the maternity clinics, and 1679 (74.8%) of them gave their consent to participate in the study  
6 and returned the baseline questionnaires. The response rate at 5 years of age was 42.5% (N=714).  
7 Children with severe chronic illnesses or disabilities, e.g., Down's syndrome or Hirschsprung  
8 disease (n=7), and all twins (n=8) were excluded. The final sample included 699 children whose  
9 parents had answered the Strengths and Difficulties Questionnaire (SDQ) (25) or the Five-to-Fifteen  
10 (FTF) (26) questionnaire at the children's age of 5 years. The questionnaire at 5 years of age  
11 included SDQ and e-media usage questions and was answered by the parents of 653 children. The  
12 FTF questionnaire was answered by the parents of 668 children. In addition, the 18-months  
13 questionnaire, which included children's media usage questions at that age, was available for 585  
14 (out of 699) children. The 18-months questionnaire did not include measures of children's  
15 psychosocial symptoms. Information concerning parental sociodemographic factors such as  
16 education and number of previous children were asked prenatally and they were available for 641  
17 children.  
18  
19  
20  
21  
22

### 23 24 **Patient and public Involvement**

25  
26  
27 Patients or the public were not involved in the design, or conduct, or reporting of the research.  
28

### 29 30 **Measures**

#### 31 32 **Screen time**

33  
34  
35 Parents reported the time a child spent engaging in electronic media activities at both 18 months and  
36 5 years of age. Separate questions were asked for weekday and weekend e-media use on how many  
37 hours a child watches programs (including on television or other devices), and (at 5 years) how  
38 many hours a child participates in electronic game-playing (on a computer, console devices, cell  
39 phones, tablets, or other devices). Questions on electronic game-playing at 18 months were not  
40 included as their use in this age-group became more common only after our data has collected (2).  
41  
42

43  
44 For the analyses, we first recoded all the reported electronic media use measures into minutes.  
45 Second, we calculated a weighted daily average (5/7 on weekdays and 2/7 at weekends) of the  
46 measures. At 18 months the daily average for program viewing ranged from 0 to 253 minutes. At 5  
47 years, separate measures for program viewing (range 225) and game-playing (range 182) were  
48 calculated, as well as the total screen time per day, by totaling both electronic media use measures  
49 (range 321). Finally, each of the electronic-media use measures (program viewing, game-playing,  
50 total screen time) was dichotomized using a 75 percentile cut-off to indicate those with the highest  
51 dose of e-media use: Program viewing at 18 months of age  $\geq 46$  mins per day (24.4%, n=143),  
52 program viewing at 5 years of age  $\geq 88$  mins per day (24.3%, n=161), use of electronic games at 5  
53 years of age  $\geq 45$  mins per day (19.3%, n=126), total screen time at 5 years of age  $\geq 135$  mins per  
54 day (24.6%, n=160).  
55  
56  
57  
58  
59

### 60 **Outcomes (5 years of age)**

Children's psychosocial symptoms were asked at the age of five years using two different parent-reported questionnaires: the FTF and the SDQ. From these questionnaires subscales most directly linked to the concept of psychosocial symptoms, i.e., emotional and behavioral problems and inattention, were included.

The FTF questionnaire is tested for its validity and reliability for the identification of internalizing and externalizing symptoms in children aged five to fifteen years (26,27). The items are categorized into eight different domains and 22 subdomains, of which we used the following four subdomains: Attention and concentration difficulties, hyperactivity and impulsivity, emotional internalizing problems, and emotional externalizing problems (28).

The SDQ children's questionnaire includes 25 items and five scales, with five items in each. It is a validated instrument to detect psychosocial problems in preschool-aged children (25), and is widely used for research purposes (19,23). In this research, we used four subscales: Hyperactivity, emotional problems, conduct problems, and peer problems.

Children scoring in the 75<sup>th</sup> percentile or over in SDQ and FTF subscales were considered to have clinically elevated levels of psychosocial symptoms. The cut-off points for the FTF scales sum scores were: Attention and concentration problems  $\geq 6$  (26%, n=172), hyperactivity and impulsivity  $\geq 6$  (27.9%, n=185), emotional internalizing problems  $\geq 2$  (22.3%, n=152), and emotional externalizing problems  $\geq 4$  (22.9%, n=152). Accordingly, the cut-off points for the SDQ scale sum scores were: Inattention-hyperactivity  $\geq 5$  (25.7%, n=171), emotional problems  $\geq 2$  (18.6%, n=124), conduct problems  $\geq 3$  (32.8%, n=218), and peer problems  $\geq 3$  (25.1%, n=167).

### Covariates

We used child's age (years, continuous), gender, number of siblings, participation in a full-time daycare (no vs. yes), and parent's education (university vs. less) as covariates that were adjusted in the statistical analyses.

### Statistical analyses

Data was analyzed using IBM SPSS statistics version 25. Frequencies of categorical/dichotomous variables as well as means and standard deviations of the continuous study variables were calculated first (see tables 1 and 2). Then, logistic regression analyses were conducted to calculate odds ratios and their 95% confidences intervals for the associations between electronic media use and outcomes. First longitudinal associations between e-media use at 18 months and FTF and SDQ scales at five years were analyzed (upper part of table 3). Then cross-sectional associations between e-media use and each of the subscales of FTF and SDQ at five years were analyzed (lower part of table 3 and table 4). In addition to the bivariate (crude) analyses, two adjusted logistic regression models were conducted: In the first model, the child's age, gender, parents' education and screen use at 18 months of age (in the analyses at five years), and in the second, fully adjusted model, the number of siblings and information on full-time daycare participation were also added to the model.

## Results

Descriptive statistics of the sample are presented in **Table 1**. The mean age of the children in the sample was 5.7 years (SD=0.5). The sample consisted of 333 girls (n=47.6%) and 366 boys (52.4%). The majority of the children (67.7%) were in full-time daycare. Most of the parents (63.4%) had a university-level degree.

On average, at 18 months of age, children spent 32.4 (SD 31.0) minutes per day with electronic media devices. At five years the amount was 114.1 minutes (SD 50.6) per day (range 321). Program viewing (mean 80.4, SD 36.3) was more popular than the use of electronic games (mean 33.4, SD 25.9).

At 18 months, 22.7% of the children spent over 60 minutes consuming screen media each day, while at 5 years of age the percentage was 94.6%. Moreover, 66.8% of the children viewed programs for more than 60 minutes per day, whereas 10.6% of the children spent more than 60 minutes per day using electronic games.

The sample was generally normative, with low levels of emotional and behavioral symptoms. The mean scores for each of the subscales of psychosocial problems based on SDQ and FTF scales are reported in **Table 2**.

**Table 3** reports the odds ratios for the associations between electronic media use at 18 months and five years of age on each of the subscales of FTF and SDQ. Based on the results, electronic media use at 18 months had less of a negative effect than at five years of age: A high amount of screen time at 18 months was associated with an increased risk of SDQ peer problems (OR 1.59,  $p=0.03$ ). The association was significant after children's age, gender, and parent's SES were adjusted (OR 1.64,  $p=0.03$ ). There was no increased risk of psychosocial problems with other subscales of FTF and SDQ.

In contrast, elevated levels of total screen time at five years of age were associated with multiple psychosocial problems: FTF attention and concentration difficulties (OR 1.88,  $p<0.01$ ), hyperactivity and impulsivity (OR 1.57,  $p=0.03$ ), internalizing symptoms (OR 1.75,  $p=0.01$ ), and externalizing symptoms (OR 1.69,  $p=0.01$ ). Moreover, it was associated with SDQ hyperactivity (OR 2.18,  $p<0.01$ ) and conduct problems (OR 1.53,  $p=0.03$ ). After fully controlling for the confounding factors, there were no other significant associations than the increased risk of FTF internalizing symptoms (OR 2.01,  $p=0.01$ ).

**Table 4** presents the odds ratios for the associations between program viewing and the use of electronic games on each of the subscales of FTF and SDQ among children at five years of age. A high amount of program viewing was associated with an increased risk of psychosocial problems, while the use of electronic games seemed less problematic. Program viewing at five years of age had an association with all of the FTF subscales (OR 1.64-1.98,  $p<0.05$ ) and with SDQ hyperactivity (OR 2.43,  $p<0.01$ ) and conduct problems (OR 1.48,  $p=0.04$ ). In the fully-adjusted

1  
2  
3 model, an increased risk appeared for attention and concentration difficulties (OR 1.91,  $p=0.01$ ) and  
4 hyperactivity and impulsivity (OR 1.67,  $p=0.03$ ), and with SDQ hyperactivity (OR 2.23,  $p<0.01$ ). In  
5 contrast, the use of electronic games was associated with an increased risk of SDQ hyperactivity  
6 (OR 1.65,  $p=0.02$ ) and only in the unadjusted model, while with the other subscales no increased  
7 risk appeared.  
8  
9

## 10 11 **Discussion**

12  
13 The aim of this study was to investigate the frequency of preschooler's e-media usage and the risks  
14 of high-dose e-media use on young children's psychosocial well-being. The results of our study  
15 show that 95% of preschoolers exceed the daily electronic media use recommendation of one hour,  
16 which is set by health professionals and pediatricians. Based on our results, increased screen time at  
17 five years of age was associated with a risk of multiple psychosocial symptoms, while increased  
18 levels of e-media use at 18 months had only few longitudinal associations for psychosocial  
19 symptoms at five years of age. Furthermore, high-dose use of electronic games at the age of five  
20 years seemed to be associated with fewer risks of psychosocial well-being than program viewing.  
21  
22  
23  
24

25 Based on the results of this study, preschoolers' average daily screen time is 114 minutes at five  
26 years of age. This number is almost two times higher than the recommended daily maximum  
27 amount of e-media, which is 60 minutes (5,13). Previous studies on preschoolers' e-media use  
28 conducted in Finland have reported similar results, as the total daily screen time was 111 minutes in  
29 2017 (14), while in Belgium it was 81 minutes (29) in 2018. Among American children, the total  
30 screen time in 2017 in this age group was somewhat higher: 159 minutes (2). It has been suggested  
31 that the products and usage culture of electronic media develops very rapidly in United States  
32 (2,30), whereas access to products might occur at a slower pace in other countries. This might  
33 explain why the frequency of usage among young children in the US is higher than in Europe.  
34  
35  
36  
37  
38

39 We discovered that high screen use at 5 years of age was associated with a risk of multiple  
40 psychosocial problems. More precisely, elevated levels of total screen time were associated with  
41 attention and concentration difficulties, hyperactivity and impulsivity, emotional internalizing and  
42 externalizing symptoms, and conduct problems. Similar results have been recently reported on  
43 emotional symptoms (19,20,23), conduct problems, and hyperactivity (20). Regarding  
44 hyperactivity, previous studies suggest that screen time may hinder the availability for activities that  
45 are considered to enhance cognitive capacities and stimulate longer attention span (31). Moreover,  
46 the harmful effect of television viewing might function by displacing developmentally important  
47 learning opportunities with an attention-capturing stimulus with a lack of developmental value  
48 (9,32). Previous studies have also reported associations between increased total screen time and  
49 peer problems (20). We did not find such associations at five years. This difference might be  
50 explained by the age of the participants: In the study of Wu et al. (2017) the mean age of the  
51 participants was 4.37, whereas in our study it was 5.68. In line with this, our findings show that  
52 screen time at an earlier age, i.e., at 18 months, was associated with peer problems later on. It seems  
53 that a high amount of screen use at a younger age is a risk factor for peer problems. However,  
54 unlike some other studies (8,19,23) we did not find high-dose use of electronic devices at 18 months  
55 of age to be associated with other problems in psychosocial well-being later on. It is possible that  
56  
57  
58  
59  
60

1  
2  
3 parents regulate younger children's e-media usage habits, while later on, other factors may have a  
4 more important role in the amount of usage. These are for example certain inherited temperamental  
5 traits of a child, such as persistence and introversion (33), or their participation in daycare.  
6  
7

8  
9 Our results show that an increased amount of program viewing at 5 years of age is associated with a  
10 risk of several psychosocial problems, while electronic game use had fewer associations, which  
11 is also consistent with recent previous studies (6,19,23). Electronic game-playing was  
12 only associated with SDQ hyperactivity, whereas no risks were found regarding other psychosocial  
13 symptoms. Previous studies have yielded an association between electronic game-playing and  
14 emotional symptoms. However, the direction of the association is contradictory: Increased e-game  
15 use has been associated with emotional problems (23), but also with better socio-emotional skills  
16 (6). The few associations between socioemotional health and game-playing might be explained by  
17 the social nature of game-playing: Children often participate in the use of e-games with siblings and  
18 other family members, for example, and develop their social and emotional skills in these social  
19 interactions (6). All in all, the amount of daily e-game usage in our study and all of these other  
20 studies was much lower compared to program viewing, which might explain why e-games are not  
21 associated with psychosocial problems to any larger extent at this age.  
22  
23  
24  
25

26  
27 As our results point out, increased screen time has multiple risks for children's psychosocial well-  
28 being. These risk factors might accumulate in the long-term, and cause problems in children's  
29 socio-emotional development later on. Health professionals and pediatricians play an important role  
30 as communicators of the current research results on the safe usage of e-media for families. Parents'  
31 knowledge might further help them to set safe boundaries for young children's e-media use and  
32 protect children's psychosocial health from associated risk factors (34).  
33  
34  
35

36  
37 One possible mechanism accounting for the result might be that the time children spend on e-media  
38 reduces the time spend on constructive activities, such as interactions with family members, reading  
39 and playing (1,4,7). At an early age, children's socio-emotional development occurs in a dynamic  
40 interplay between social learning and environmental factors. Furthermore, if the surrounding  
41 environment does not offer enough means for a child's healthy development, it might affect a  
42 children's psychosocial well-being (35). Genetic dispositions also play a role in modifying  
43 individual risks. However, the direction of the effect of e-media use is unclear, as some parents  
44 might use e-media devices as a tool to calm their children down, especially when the child has  
45 socio-emotional difficulties (15). It is possible, that there is a bidirectional link between the two  
46 factors.  
47  
48  
49

50  
51 One strength of our study is its longitudinal study setting and its repeated measurement of e-media  
52 exposure. Moreover, patterns of children's electronic media usage are rapidly changing, and our  
53 study offers results on the associations between young children's e-media use and their  
54 psychosocial well-being based on recent data. In addition, the sample is based on a representative  
55 birth cohort recruited during pregnancy.  
56  
57

58  
59 A limitation of our study is that those with lower education seem to be underrepresented in the  
60 sample, which is common according to studies on drop-out rates in longitudinal studies on mental

1  
2  
3 health (36). Moreover, single mothers are underrepresented in the sample. Another limitation is that  
4 psychological symptoms at 18 months of age were not assessed. The measurement of e-media use  
5 was based on parental questionnaires and not logs. However, in a previous study (14) conducted in  
6 Finland among a comparable age-group and using parental logs on child's e-media use, the reported  
7 daily total e-media exposure was 111 minutes, while in our study the respective figure was 114  
8 minutes. This suggests that the reported exposures in our study could be relatively reliable.  
9 Nevertheless, in future studies, parent reports of children's e-media use need to be validated with  
10 objective measures. In the future, more research is needed on the family conditions of high-dose e-  
11 media users.  
12  
13  
14

## 15 16 **Conclusion**

17  
18  
19 This study reported the risks associated with high-dose use of electronic media devices by young  
20 children. Our results show that 5-year-old children spend considerably more time on e-media than is  
21 recommended by professionals. Our results further indicate that high levels of e-media use,  
22 especially program viewing, is associated with problems with psychosocial outcomes, while e-  
23 games play a lesser role among five-year-olds. Children's social-emotional development is  
24 influenced by environmental factors, including electronic media habits. Although children's  
25 electronic media use patterns might not seem problematic when considering use on a daily level,  
26 they do have risks in the long term. Thus, health professionals play a key role in providing  
27 information for parents on screen media parenting, i.e., the safe use of e-media devices among  
28 young children in order to protect their healthy development.  
29  
30  
31  
32

## 33 **Acknowledgement**

34  
35  
36 The authors would like to thank all the families that participated in the CHILD-SLEEP cohorts. The  
37 authors are also grateful for the nurses at the maternity clinics who introduced the study to the  
38 families.  
39

## 40 **Contributorship statement**

41  
42  
43 EJP and OSH designed the study. JN, OK, and EJP were primarily responsible for data analysis and  
44 writing of the article. RV and OSH contributed critically to the writing of the article.  
45  
46

## 47 **Competing interests**

48  
49 The authors declare no competing interests.  
50

## 51 **Funding**

52  
53  
54 This work was supported by The Academy of Finland (#308588, #277557), the Signe and Ane  
55 Gyllenberg foundation, the Yrjö Jahnsson Foundation, the Foundation for Pediatric Research, the  
56 Finnish Cultural Foundation, the Competitive Research Financing of the Expert Responsibility area  
57 of Tampere University Hospital, and Doctors' Association in Tampere.  
58  
59  
60

## Data sharing statement

Data is not publicly available due to legal restrictions and confidential nature of the data. Data is available upon request. Requests may be sent to The Finnish Institute for Health and Welfare, who is the controller of the data. For more information about data access, please see

<https://thl.fi/en/web/thlfi-en/statistics/information-for-researchers>.

## References

1. Radesky JS. *Increased Screen Time Implications for Early Childhood Development and Behavior*. 2016;63:827–39.
2. Rideout V. “The common sense census: Media use by kids age zero to eight.” San Francisco, CA; 2017.
3. Kabali HK, Irigoyen MM, Nunez-Davis R, Budacki JG, Mohanty SH, Leister KP, et al. Exposure and use of mobile media devices by young children. *Pediatrics*. 2015;136(6):1044–50.
4. Gerwin RL, Kaliebe K, Daigle M. The Interplay Between Digital Media Use and Development. *Child Adolesc Psychiatr Clin N Am*. 2018;27(2):345–55.
5. American Academy of Pediatrics. American Academy of Pediatrics Announces New Recommendations for Children’s Media Use. 2016.
6. Hinkley T, Timperio A, Salmon J, Hesketh AK. Does preschool physical activity and electronic media use predict later social and emotional skills at 6 to 8 years? A cohort study. *J Phys Act Heal*. 2017;14(4):308–16.
7. Christakis DA, Gilkerson J, Richards JA, Zimmerman FJ, Garrison MM, Xu D, et al. Audible television and decreased adult words, infant vocalizations, and conversational turns: A population-based study. *Arch Pediatr Adolesc Med*. 2009;163(6):554–8.
8. Christakis DA, Zimmerman FJ, DiGiuseppe DL, McCarty CA. Early Television Exposure and Subsequent Attentional Problems in Children. *Pediatrics*. 2004;113(4 I):708–13.
9. Lissak G. Adverse physiological and psychological effects of screen time on children and adolescents: Literature review and case study. *Environ Res*. 2018;164(October 2017):149–57. Available from: <https://doi.org/10.1016/j.envres.2018.01.015>
10. Madigan S, McArthur BA, Anhorn C, Eirich R, Christakis DA. Associations Between Screen Use and Child Language Skills: A Systematic Review and Meta-analysis. *JAMA Pediatr*. 2020 Jul 1;174(7):665–75. Available from: <https://doi.org/10.1001/jamapediatrics.2020.0327>
11. Immordino-yang MH, Mccoll A, Damasio H, Damasio A. Neural correlates of admiration and compassion. 2009;106(19).
12. Domoff SE, Harrison K, Gearhardt AN, Douglas A, Lumeng JC, Miller AL, et al. Development and Validation of the Problematic Media Use Measure: A Parent Report Measure of Screen Media “Addiction” in Children. *Psychol Pop Media Cult*. 2020;8(1):2–11.
13. WHO. Guidelines on physical activity, sedentary behaviour and sleep for children under 5 years of age. World Health Organization. 2019. 33 p.
14. Määttä S, Kontinen H, Haukkala A, Erkkola M, Roos E. Preschool children’s context-specific sedentary behaviours and parental socioeconomic status in Finland: A cross-sectional study. *BMJ Open*. 2017;7(11):1–10.
15. Radesky JS, Peacock-Chambers E, Zuckerman B, Silverstein M. Use of mobile technology to calm upset children: Associations with social-emotional development. *JAMA Pediatr*. 2016;170(4):397–9.
16. Paudel S, Jancey J, Subedi N, Leavy J. Correlates of mobile screen media use among children aged 0-8: A systematic review. *BMJ Open*. 2017;7(10):1–12.
17. Jones RA, Downing K, Rinehart NJ, Barnett LM, May T, McGillivray JA, et al. Physical activity, sedentary behavior and their correlates in children with Autism Spectrum Disorder: A systematic review. *PLoS One*. 2017 Feb 28;12(2):e0172482. Available from: <https://doi.org/10.1371/journal.pone.0172482>
18. Chonchaiya W, Nuntnarumit P, Pruksananonda C. Comparison of television viewing between children with autism spectrum disorder and controls. *Acta Paediatr Int J Paediatr*. 2011;100(7):1033–7.
19. McNeill J, Howard SJ, Vella SA, Cliff DP. Longitudinal Associations of Electronic Application Use and Media Program Viewing with Cognitive and Psychosocial Development in Preschoolers. *Acad Pediatr*. 2019;19(5):520–8. Available from: <https://doi.org/10.1016/j.acap.2019.02.010>
20. Wu X, Tao S, Rutayisire E, Chen Y, Huang K, Tao F. The relationship between screen time, nighttime sleep duration, and behavioural problems in preschool children in China. *Eur Child Adolesc Psychiatry*. 2017;26(5):541–8.



21. Manganello JA, Taylor CA. Television exposure as a risk factor for aggressive behavior among 3-year-old children. *Arch Pediatr Adolesc Med.* 2009;163(11):1037–45.
22. Pagani LS, Fitzpatrick C, Barnett TA, Dubow E. Prospective associations between early childhood television exposure and academic, psychosocial, and physical well-being by middle childhood. *Arch Pediatr Adolesc Med.* 2010;164(5):425–31.
23. Hinkley T, Verbestel V, Ahrens W, Lissner L, Molnar D, Moreno LA, et al. Early childhood electronic media use as a predictor of poorer well-being: a prospective cohort study. *JAMA Pediatr.* 2014;168(5):485–92.
24. Paavonen JE, Saarenpää-Heikkilä O, Pölkki P, Kylliäinen A, Porkka-Heiskanen T, Paunio T. Maternal and paternal sleep during pregnancy in the Child-sleep birth cohort. *Sleep Med.* 2017;29:47–56.
25. Theunissen MHC, Vogels AGC, De Wolff MS, Reijneveld SA. Characteristics of the strengths and difficulties questionnaire in preschool children. *Pediatrics.* 2013;131(2):3–4.
26. Korkman M, Jaakkola M, Ahlroth A, Pesonen AE, Turunen MM. Screening of developmental disorders in five-year-olds using the FTF (Five to Fifteen) questionnaire: A validation study. *Eur Child Adolesc Psychiatry, Suppl.* 2004;13(3):31–8.
27. Bohlin G, Janols LO. Behavioural problems and psychiatric symptoms in 5-13 year-old Swedish children - A comparison of parent ratings on the FTF (Five to Fifteen) with the ratings on CBCL (Child Behavior Checklist). *Eur Child Adolesc Psychiatry, Suppl.* 2004;13(3):14–22.
28. Kadesjö B, Janols LO, Korkman M, Mickelsson K, Strand G, Trillingsgaard A, et al. The FTF (Five to Fifteen): The development of a parent questionnaire for the assessment of ADHD and comorbid conditions. *Eur Child Adolesc Psychiatry, Suppl.* 2004;13(3):3–13.
29. De Craemer M, McGregor D, Androutsos O, Manios Y, Cardon G. Compliance with 24-h movement behaviour guidelines among belgian pre-school children: The toybox-study. *Int J Environ Res Public Health.* 2018;15(10):1–10.
30. Vandewater EA, Rideout VJ, Wartella EA, Huang X, Lee JH, Shim MS. Digital childhood: Electronic media and technology use among infants, toddlers, and preschoolers. *Pediatrics.* 2007;119(5).
31. Nikkelen SWC, Valkenburg PM, Huizinga M, Bushman BJ. Media Use and ADHD-Related Behaviors in Children and Adolescents : A Meta-Analysis. 2014;50(9):2228–41.
32. Zimmerman FJ, Christakis DA. Associations Between Content Types of Early Media Exposure and Subsequent Attentional Problems. *Pediatrics.* 2007;120(5):986–92.
33. Allen MS, Vella SA, Laborde S. Sport participation, screen time, and personality trait development during childhood. *Br J Dev Psychol.* 2015;33(3):375–90.
34. Connor TMO, Hingle M, Chuang R, Gorely T, Hinkley T, Jago R, et al. Conceptual Understanding of Screen Media Parenting: Report of a Working Group. 2013;9(August):110–9.
35. Feldman R, Eidelman AI. Biological and environmental initial conditions shape the trajectories of cognitive and social-emotional development across the first years of life. *Dev Sci.* 2009;12(1):194–200.
36. Granero Pérez R, Ezpeleta L, Domenech JM. Features associated with the non-participation and drop out by socially-at-risk children and adolescents in mental-health epidemiological studies. *Soc Psychiatry Psychiatr Epidemiol.* 2007;42(3):251–8.

Table 1. Descriptive statistics of sociodemographic factors and measures of screen time (N=699)

|                                                           | % (N)               |
|-----------------------------------------------------------|---------------------|
| <b>Sociodemographic factors</b>                           |                     |
| Child's gender                                            |                     |
| Girls                                                     | 47.6 (333)          |
| Boys                                                      | 52.4 (366)          |
| Child's age, years; mean (SD)                             | 5.68 (0.54)         |
| Parent's education                                        |                     |
| University-level degree                                   | 63.4 (409)          |
| Less than university-level degree                         | 36.6 (236)          |
| Number of siblings                                        |                     |
| 0                                                         | 51.0 (327)          |
| 1                                                         | 32.2 (207)          |
| 2                                                         | 12.9 (83)           |
| 3                                                         | 2.5 (16)            |
| 4 or more                                                 | 1.2 (8)             |
| Full-time daycare                                         |                     |
| No                                                        | 32.3 (214)          |
| Yes                                                       | 67.7 (448)          |
| <b>Screen time</b>                                        |                     |
| Total screen time at 18 months, min; mean (SD), range     | 32.4 (31.0), 252.9  |
| Over 60 minutes, %                                        | 22.7 (136)          |
| Over 120 minutes, %                                       | 2.8 (17)            |
| Program viewing at 5 years, min; mean (SD), range         | 80.4 (36.3), 225.0  |
| Over 60 minutes, %                                        | 66.8 (442)          |
| Over 120 minutes, %                                       | 16.9 (112)          |
| Electronic game-playing at 5 years, min; mean (SD), range | 33.4 (25.9), 182.1  |
| Over 60 minutes, %                                        | 10.6 (69)           |
| Over 120 minutes, %                                       | 2.3 (15)            |
| Total screen time at 5 years, min; mean (SD), range       | 114.1 (50.6), 321.4 |
| Over 60 minutes, %                                        | 94.6 (615)          |
| Over 120 minutes, %                                       | 40.2 (261)          |
| Over 180 minutes, %                                       | 11.5 (75)           |

1  
2  
3  
4  
5  
6  
7  
8  
9  
10  
11  
12  
13  
14  
15  
16  
17  
18  
19  
20  
21  
22  
23  
24  
25  
26  
27  
28  
29  
30  
31  
32  
33  
34  
35  
36  
37  
38  
39  
40  
41  
42  
43  
44  
45  
46  
47  
48  
49  
50  
51  
52  
53  
54  
55  
56  
57  
58  
59  
60

Table 2. Outcome variables.

| Outcome variable                         | Mean (SD)   | Range |
|------------------------------------------|-------------|-------|
| FTF                                      |             |       |
| Attention and concentration difficulties | 3.75 (3.41) | 18.00 |
| Hyperactivity and impulsivity            | 3.98 (3.63) | 18.00 |
| Emotional/internalizing symptoms         | 1.52 (1.79) | 15.00 |
| Emotional/externalizing symptoms         | 2.83 (3.25) | 21.00 |
| SDQ                                      |             |       |
| Hyperactivity                            | 3.04 (2.34) | 10.00 |
| Emotional problems                       | 1.38 (1.48) | 9.00  |
| Conduct problems                         | 1.97 (1.59) | 9.00  |
| Peer problems                            | 1.69 (1.38) | 9.00  |

For peer review only

Table 3. Associations between electronic media use at 18 months and 5 years of age with psychosocial well-being at age 5 years.

| <i>Screen time: 18 months of age</i>     | <i>Crude</i> |                  |                 | <i>Adjusted 1<sup>a</sup></i> |                  |             | <i>Adjusted 2<sup>b</sup></i> |                  |             |
|------------------------------------------|--------------|------------------|-----------------|-------------------------------|------------------|-------------|-------------------------------|------------------|-------------|
|                                          | <i>OR</i>    | <i>95% CI</i>    | <i>p</i>        | <i>OR</i>                     | <i>95% CI</i>    | <i>p</i>    | <i>OR</i>                     | <i>95% CI</i>    | <i>p</i>    |
| <b>FTF</b>                               |              |                  |                 |                               |                  |             |                               |                  |             |
| Attention and concentration difficulties | 1.46         | 0.96-2.22        | 0.07            | 1.50                          | 0.97-2.31        | 0.07        | 1.41                          | 0.89-2.22        | 0.14        |
| Hyperactivity and impulsivity            | 1.16         | 0.76-1.77        | 0.50            | 1.16                          | 0.75-1.81        | 0.50        | 1.14                          | 0.72-1.80        | 0.59        |
| Emotional/internalizing symptoms         | 1.19         | 0.76-1.88        | 0.45            | 1.15                          | 0.72-1.85        | 0.55        | 1.13                          | 0.69-1.86        | 0.62        |
| Emotional/externalizing symptoms         | 1.03         | 0.66-1.60        | 0.91            | 1.04                          | 0.65-1.65        | 0.88        | 1.06                          | 0.65-1.72        | 0.82        |
| <b>SDQ</b>                               |              |                  |                 |                               |                  |             |                               |                  |             |
| Hyperactivity                            | 1.49         | 0.98-2.26        | 0.06            | 1.37                          | 0.89-2.12        | 0.15        | 1.37                          | 0.87-2.18        | 0.18        |
| Emotional problems                       | 1.36         | 0.86-2.17        | 0.19            | 1.38                          | 0.85-2.23        | 0.19        | 1.47                          | 0.88-2.45        | 0.14        |
| Conduct problems                         | 1.24         | 0.84-1.84        | 0.28            | 1.26                          | 0.84-1.90        | 0.27        | 1.23                          | 0.80-1.90        | 0.35        |
| Peer problems                            | <b>1.59</b>  | <b>1.04-2.41</b> | <b>0.03</b>     | <b>1.64</b>                   | <b>1.06-2.52</b> | <b>0.03</b> | 1.56                          | 0.98-2.46        | 0.06        |
| <b>Total screen time: 5 years of age</b> |              |                  |                 |                               |                  |             |                               |                  |             |
| <b>FTF</b>                               |              |                  |                 |                               |                  |             |                               |                  |             |
| Attention and concentration difficulties | <b>1.88</b>  | <b>1.27-2.80</b> | <b>&lt;0.01</b> | 1.45                          | 0.92-2.28        | 0.11        | 1.57                          | 0.97-2.53        | 0.07        |
| Hyperactivity and impulsivity            | <b>1.57</b>  | <b>1.06-2.33</b> | <b>0.03</b>     | 1.33                          | 0.85-2.12        | 0.22        | 1.31                          | 0.81-2.13        | 0.28        |
| Emotional/internalizing symptoms         | <b>1.75</b>  | <b>1.15-2.65</b> | <b>0.01</b>     | <b>1.84</b>                   | <b>1.14-2.97</b> | <b>0.01</b> | <b>2.01</b>                   | <b>1.21-3.34</b> | <b>0.01</b> |
| Emotional/externalizing symptoms         | <b>1.69</b>  | <b>1.12-2.55</b> | <b>0.01</b>     | 1.39                          | 0.87-2.23        | 0.17        | 1.54                          | 0.94-2.52        | 0.09        |
| <b>SDQ</b>                               |              |                  |                 |                               |                  |             |                               |                  |             |
| Hyperactivity                            | <b>2.18</b>  | <b>1.49-3.20</b> | <b>&lt;0.01</b> | <b>1.60</b>                   | <b>1.02-2.49</b> | <b>0.04</b> | 1.55                          | 0.97-2.48        | 0.07        |
| Emotional problems                       | 0.99         | 0.62-1.56        | 0.95            | 0.98                          | 0.58-1.66        | 0.94        | 0.90                          | 0.49-1.61        | 0.70        |
| Conduct problems                         | <b>1.53</b>  | <b>1.05-2.21</b> | <b>0.03</b>     | 1.24                          | 0.81-1.91        | 0.32        | 1.06                          | 0.67-1.67        | 0.80        |
| Peer problems                            | 1.06         | 0.71-1.60        | 0.77            | 0.90                          | 0.56-1.45        | 0.67        | 0.85                          | 0.51-1.42        | 0.53        |

<sup>a</sup> Adjusted for age, gender, parent's education. Total screen time at 5 years of age: Also adjusted for screen time at 18 months of age.

<sup>b</sup> Adjusted for age, gender, parent's education, number of siblings, and daycare participation. Total screen time at 5 years of age: Also adjusted for screen time at 18 months of age.

Table 4. Associations between program viewing and use of electronic games at 5 years of age with psychosocial well-being.

| <i><b>Program viewing: 5 years of age</b></i>         | <i><b>Crude</b></i> |                      |                 | <i><b>Adjusted 1<sup>a</sup></b></i> |                      |                 | <i><b>Adjusted 2<sup>b</sup></b></i> |                      |                 |
|-------------------------------------------------------|---------------------|----------------------|-----------------|--------------------------------------|----------------------|-----------------|--------------------------------------|----------------------|-----------------|
|                                                       | <i><b>OR</b></i>    | <i><b>95% CI</b></i> | <i><b>p</b></i> | <i><b>OR</b></i>                     | <i><b>95% CI</b></i> | <i><b>p</b></i> | <i><b>OR</b></i>                     | <i><b>95% CI</b></i> | <i><b>p</b></i> |
| <b>FTF</b>                                            |                     |                      |                 |                                      |                      |                 |                                      |                      |                 |
| Attention and concentration difficulties              | <b>1.98</b>         | <b>1.34-2.93</b>     | <b>&lt;0.01</b> | <b>1.71</b>                          | <b>1.10-2.69</b>     | <b>0.02</b>     | <b>1.91</b>                          | <b>1.19-3.08</b>     | <b>0.01</b>     |
| Hyperactivity and impulsivity                         | <b>1.64</b>         | <b>1.11-2.42</b>     | <b>0.01</b>     | <b>1.68</b>                          | <b>1.07-2.63</b>     | <b>0.02</b>     | <b>1.67</b>                          | <b>1.04-2.69</b>     | <b>0.03</b>     |
| Emotional/internalizing symptoms                      | <b>1.68</b>         | <b>1.11-2.54</b>     | <b>0.01</b>     | 1.59                                 | 0.99-2.55            | 0.06            | <b>1.71</b>                          | <b>1.03-2.84</b>     | <b>0.04</b>     |
| Emotional/externalizing symptoms                      | <b>1.69</b>         | <b>1.12-2.55</b>     | <b>0.01</b>     | 1.14                                 | 0.71-1.84            | 0.59            | 1.19                                 | 0.72-1.96            | 0.50            |
| <b>SDQ</b>                                            |                     |                      |                 |                                      |                      |                 |                                      |                      |                 |
| Hyperactivity                                         | <b>2.43</b>         | <b>1.66-3.56</b>     | <b>&lt;0.01</b> | <b>2.29</b>                          | <b>1.47-3.55</b>     | <b>&lt;0.01</b> | <b>2.23</b>                          | <b>1.40-3.54</b>     | <b>&lt;0.01</b> |
| Emotional problems                                    | 0.99                | 0.63-1.56            | 0.97            | 0.94                                 | 0.56-1.57            | 0.80            | 0.86                                 | 0.48-1.53            | 0.60            |
| Conduct problems                                      | <b>1.49</b>         | <b>1.03-2.15</b>     | <b>0.04</b>     | 1.31                                 | 0.85-2.00            | 0.22            | 1.16                                 | 0.74-1.82            | 0.51            |
| Peer problems                                         | 1.04                | 0.69-1.56            | 0.86            | 0.93                                 | 0.58-1.50            | 0.77            | 0.87                                 | 0.52-1.44            | 0.58            |
| <i><b>Use of electronic games: 5 years of age</b></i> |                     |                      |                 |                                      |                      |                 |                                      |                      |                 |
| <b>FTF</b>                                            |                     |                      |                 |                                      |                      |                 |                                      |                      |                 |
| Attention and concentration difficulties              | 0.95                | 0.60-1.51            | 0.82            | 0.69                                 | 0.41-1.16            | 0.16            | 0.67                                 | 0.38-1.17            | 0.16            |
| Hyperactivity and impulsivity                         | 1.20                | 0.77-1.87            | 0.42            | 0.89                                 | 0.54-1.48            | 0.66            | 0.82                                 | 0.48-1.42            | 0.48            |
| Emotional/internalizing symptoms                      | 1.22                | 0.76-1.96            | 0.40            | 1.27                                 | 0.75-2.16            | 0.38            | 1.36                                 | 0.78-2.40            | 0.28            |
| Emotional/externalizing symptoms                      | 1.37                | 0.86-2.16            | 0.19            | 1.23                                 | 0.74-2.05            | 0.42            | 1.42                                 | 0.83-2.42            | 0.20            |
| <b>SDQ</b>                                            |                     |                      |                 |                                      |                      |                 |                                      |                      |                 |
| Hyperactivity                                         | <b>1.65</b>         | <b>1.08-2.51</b>     | <b>0.02</b>     | 1.06                                 | 0.65-1.72            | 0.81            | 0.98                                 | 0.58-1.66            | 0.95            |
| Emotional problems                                    | 0.95                | 0.58-1.58            | 0.85            | 1.10                                 | 0.63-1.92            | 0.75            | 1.04                                 | 0.55-1.97            | 0.90            |
| Conduct problems                                      | 1.04                | 0.69-1.57            | 0.85            | 0.88                                 | 0.55-1.40            | 0.58            | 0.75                                 | 0.50-1.25            | 0.27            |
| Peer problems                                         | 1.10                | 0.71-1.70            | 0.69            | 0.87                                 | 0.52-1.46            | 0.60            | 0.83                                 | 0.48-1.44            | 0.51            |

<sup>a</sup> Adjusted for age, gender, parent’s education, screen time at 18 months of age.

<sup>b</sup> Adjusted for age, gender, parent’s education, siblings, and daycare participation, screen time at 18 months of age.

**STROBE 2007 (v4) Statement—Checklist of items that should be included in reports of *cohort studies***

| Section/Topic                | Item # | Recommendation                                                                                                                                                                       | Reported on page # |
|------------------------------|--------|--------------------------------------------------------------------------------------------------------------------------------------------------------------------------------------|--------------------|
| <b>Title and abstract</b>    | 1      | (a) Indicate the study's design with a commonly used term in the title or the abstract                                                                                               | 1                  |
|                              |        | (b) Provide in the abstract an informative and balanced summary of what was done and what was found                                                                                  | Abstract page      |
| <b>Introduction</b>          |        |                                                                                                                                                                                      |                    |
| Background/rationale         | 2      | Explain the scientific background and rationale for the investigation being reported                                                                                                 | 1-2                |
| Objectives                   | 3      | State specific objectives, including any prespecified hypotheses                                                                                                                     | 2                  |
| <b>Methods</b>               |        |                                                                                                                                                                                      |                    |
| Study design                 | 4      | Present key elements of study design early in the paper                                                                                                                              | 2-3                |
| Setting                      | 5      | Describe the setting, locations, and relevant dates, including periods of recruitment, exposure, follow-up, and data collection                                                      | 2-3                |
| Participants                 | 6      | (a) Give the eligibility criteria, and the sources and methods of selection of participants. Describe methods of follow-up                                                           | 3                  |
|                              |        | (b) For matched studies, give matching criteria and number of exposed and unexposed                                                                                                  |                    |
| Variables                    | 7      | Clearly define all outcomes, exposures, predictors, potential confounders, and effect modifiers. Give diagnostic criteria, if applicable                                             | 3-4                |
| Data sources/<br>measurement | 8*     | For each variable of interest, give sources of data and details of methods of assessment (measurement). Describe comparability of assessment methods if there is more than one group | 3-4                |
| Bias                         | 9      | Describe any efforts to address potential sources of bias                                                                                                                            | 8                  |
| Study size                   | 10     | Explain how the study size was arrived at                                                                                                                                            | 3                  |
| Quantitative variables       | 11     | Explain how quantitative variables were handled in the analyses. If applicable, describe which groupings were chosen and why                                                         | 3-4                |
| Statistical methods          | 12     | (a) Describe all statistical methods, including those used to control for confounding                                                                                                | 4-5                |
|                              |        | (b) Describe any methods used to examine subgroups and interactions                                                                                                                  | -                  |
|                              |        | (c) Explain how missing data were addressed                                                                                                                                          | 3                  |
|                              |        | (d) If applicable, explain how loss to follow-up was addressed                                                                                                                       |                    |
|                              |        | (e) Describe any sensitivity analyses                                                                                                                                                | -                  |

|                          |     |                                                                                                                                                                                                              |                |
|--------------------------|-----|--------------------------------------------------------------------------------------------------------------------------------------------------------------------------------------------------------------|----------------|
| <b>Results</b>           |     |                                                                                                                                                                                                              |                |
| Participants             | 13* | (a) Report numbers of individuals at each stage of study—eg numbers potentially eligible, examined for eligibility, confirmed eligible, included in the study, completing follow-up, and analysed            | 3-4            |
|                          |     | (b) Give reasons for non-participation at each stage                                                                                                                                                         | 3-4            |
|                          |     | (c) Consider use of a flow diagram                                                                                                                                                                           |                |
| Descriptive data         | 14* | (a) Give characteristics of study participants (eg demographic, clinical, social) and information on exposures and potential confounders                                                                     | 4-5            |
|                          |     | (b) Indicate number of participants with missing data for each variable of interest                                                                                                                          | 4              |
|                          |     | (c) Summarise follow-up time (eg, average and total amount)                                                                                                                                                  | 4-5            |
| Outcome data             | 15* | Report numbers of outcome events or summary measures over time                                                                                                                                               | Table 2        |
| Main results             | 16  | (a) Give unadjusted estimates and, if applicable, confounder-adjusted estimates and their precision (eg, 95% confidence interval). Make clear which confounders were adjusted for and why they were included | Tables 3 and 4 |
|                          |     | (b) Report category boundaries when continuous variables were categorized                                                                                                                                    | 3-4            |
|                          |     | (c) If relevant, consider translating estimates of relative risk into absolute risk for a meaningful time period                                                                                             |                |
| Other analyses           | 17  | Report other analyses done—eg analyses of subgroups and interactions, and sensitivity analyses                                                                                                               | -              |
| <b>Discussion</b>        |     |                                                                                                                                                                                                              |                |
| Key results              | 18  | Summarise key results with reference to study objectives                                                                                                                                                     | 6              |
| <b>Limitations</b>       |     |                                                                                                                                                                                                              |                |
| Interpretation           | 20  | Give a cautious overall interpretation of results considering objectives, limitations, multiplicity of analyses, results from similar studies, and other relevant evidence                                   | 8              |
| Generalisability         | 21  | Discuss the generalisability (external validity) of the study results                                                                                                                                        | 8              |
| <b>Other information</b> |     |                                                                                                                                                                                                              |                |
| Funding                  | 22  | Give the source of funding and the role of the funders for the present study and, if applicable, for the original study on which the present article is based                                                | 9              |

\*Give information separately for cases and controls in case-control studies and, if applicable, for exposed and unexposed groups in cohort and cross-sectional studies.

**Note:** An Explanation and Elaboration article discusses each checklist item and gives methodological background and published examples of transparent reporting. The STROBE checklist is best used in conjunction with this article (freely available on the Web sites of PLoS Medicine at <http://www.plosmedicine.org/>, Annals of Internal Medicine at <http://www.annals.org/>, and Epidemiology at <http://www.epidem.com/>). Information on the STROBE Initiative is available at [www.strobe-statement.org](http://www.strobe-statement.org).

# BMJ Open

## High-dose electronic media use in five-year-olds and its association with their psychosocial symptoms – a cohort study

|                                 |                                                                                                                                                                                                                                                                                                                                                                        |
|---------------------------------|------------------------------------------------------------------------------------------------------------------------------------------------------------------------------------------------------------------------------------------------------------------------------------------------------------------------------------------------------------------------|
| Journal:                        | <i>BMJ Open</i>                                                                                                                                                                                                                                                                                                                                                        |
| Manuscript ID                   | bmjopen-2020-040848.R2                                                                                                                                                                                                                                                                                                                                                 |
| Article Type:                   | Original research                                                                                                                                                                                                                                                                                                                                                      |
| Date Submitted by the Author:   | 10-Dec-2020                                                                                                                                                                                                                                                                                                                                                            |
| Complete List of Authors:       | Niiranen, Janette; Finnish Institute for Health and Welfare, Department of Public Health Solutions<br>Kiviruusu, Olli; Finnish Institute for Health and Welfare<br>Vornanen, Riitta; University of Eastern Finland - Kuopio Campus<br>Saarenpää-Heikkilä, Outi; University of Tampere, Pediatric Clinics<br>Paavonen, Juulia; Finnish Institute for Health and Welfare |
| <b>Primary Subject Heading</b>: | Paediatrics                                                                                                                                                                                                                                                                                                                                                            |
| Secondary Subject Heading:      | Epidemiology, Mental health                                                                                                                                                                                                                                                                                                                                            |
| Keywords:                       | EPIDEMIOLOGY, Community child health < PAEDIATRICS, Child & adolescent psychiatry < PSYCHIATRY                                                                                                                                                                                                                                                                         |
|                                 |                                                                                                                                                                                                                                                                                                                                                                        |

SCHOLARONE™  
Manuscripts





I, the Submitting Author has the right to grant and does grant on behalf of all authors of the Work (as defined in the below author licence), an exclusive licence and/or a non-exclusive licence for contributions from authors who are: i) UK Crown employees; ii) where BMJ has agreed a CC-BY licence shall apply, and/or iii) in accordance with the terms applicable for US Federal Government officers or employees acting as part of their official duties; on a worldwide, perpetual, irrevocable, royalty-free basis to BMJ Publishing Group Ltd ("BMJ") its licensees and where the relevant Journal is co-owned by BMJ to the co-owners of the Journal, to publish the Work in this journal and any other BMJ products and to exploit all rights, as set out in our [licence](#).

The Submitting Author accepts and understands that any supply made under these terms is made by BMJ to the Submitting Author unless you are acting as an employee on behalf of your employer or a postgraduate student of an affiliated institution which is paying any applicable article publishing charge ("APC") for Open Access articles. Where the Submitting Author wishes to make the Work available on an Open Access basis (and intends to pay the relevant APC), the terms of reuse of such Open Access shall be governed by a Creative Commons licence – details of these licences and which [Creative Commons](#) licence will apply to this Work are set out in our licence referred to above.

Other than as permitted in any relevant BMJ Author's Self Archiving Policies, I confirm this Work has not been accepted for publication elsewhere, is not being considered for publication elsewhere and does not duplicate material already published. I confirm all authors consent to publication of this Work and authorise the granting of this licence.

1  
2  
3 High-dose electronic media use in five-year-olds and its association with  
4 their psychosocial symptoms – a cohort study  
5  
6  
7  
8  
9

10 Niiranen J<sup>1</sup>, Kiviruusu O<sup>1</sup>, Vornanen R<sup>2</sup>, Saarenpää-Heikkilä O<sup>3,4</sup>, Paavonen EJ<sup>1,5</sup>.  
11  
12  
13  
14  
15  
16

17 1 Department of Public Health Solutions, Finnish Institute for Health and Welfare, Helsinki, Finland

18 2 University of Eastern Finland, Department of Social Sciences, Kuopio, Finland

19 3 Pediatric Clinics, Tampere University Hospital, Tampere, Finland

20 4 Tampere Centre for Child Health Research, University of Tampere and Tampere University  
21 Hospital, Tampere, Finland

22 5 Pediatric Research Center, Child Psychiatry, University of Helsinki and Helsinki University  
23 Hospital, Helsinki, Finland  
24  
25  
26

27  
28 **Correspondence to**  
29

30 juulia.paavonen@helsinki.fi  
31  
32  
33  
34  
35  
36  
37  
38  
39  
40  
41  
42  
43  
44  
45  
46  
47  
48  
49  
50  
51  
52  
53  
54  
55  
56  
57  
58  
59  
60

## Abstract

**Objectives** This study investigated the frequency of preschooler's electronic media (e-media) usage and the risks of high-dose e-media use on young children's psychosocial well-being.

**Design** We study longitudinal associations between e-media use at 18 months and psychosocial symptoms at five years of age, as well as cross-sectional associations between e-media use and psychosocial symptoms at five years.

**Setting** Between 2011 and 2017 in Finland.

**Participants** Children aged 5 years (N=699).

**Primary and secondary outcome measures** Children's psychosocial symptoms were asked at the age of five years using the parent-reported questionnaires Five-to-Fifteen (FTF) and the Strengths and Difficulties Questionnaire (SDQ).

**Results** Based on our results, 95% of the preschoolers exceed the daily electronic media use recommendation set by health professionals. Our results indicate that increased screen time at five years of age is associated with a risk of multiple psychosocial symptoms (OR=1.53-2.18, 95% CI: 1.05-3.20,  $p<0.05$ ), while increased levels of e-media use at 18 months was only associated with FTF peer problems (OR=1.59, CI: 1.04-2.41,  $p=0.03$ ). Moreover, high-dose use of electronic games at the age of five years seems to be associated with fewer risks for psychosocial well-being than program viewing, as it was only associated with SDQ hyperactivity (OR=1.65, CI: 1.49-3.20,  $p=0.02$ ).

**Conclusion** Increased screen time has multiple risks for children's psychosocial well-being. These risk factors seem to be significant in the long term, and are related to problems in children's socio-emotional development later on. Health professionals and pediatricians have an important role as communicators of the current research results on the safe usage time of e-media for families, and enhance parents' skills as regulators of children's safe e-media use. In the future, more research is needed on the family conditions of high-dose e-media users.

### Strengths and limitations of this study

- A major strength of our study is the longitudinal study setting and repeated measurement of e-media exposure.
- Additionally, patterns of children's electronic media use are rapidly changing, and our study offers results on the associations of young children's e-media usage with their psychosocial well-being based on recent data.
- The limitation of our study is the measurement of e-media use that was based on parental questionnaires and not logs.
- Moreover, the sample is based on a representative birth cohort recruited during pregnancy.
- However, single mothers as well as those with lower education seem to be underrepresented in the sample.

**Keywords:** Child psychiatry, child psychiatric epidemiology, pediatrics, child mental health, child development, e-media

## Introduction

In recent years, as digital technology has rapidly developed, electronic media (e-media) has become an almost universal part of young children's daily life. Even at preschool age, e-media use is already a popular sedentary behavior (1). Traditional e-media is often used: nearly half of preschool-age children watch TV (2), use a laptop or desktop computer, and play video consoles daily (3). However, the pattern of how media is used has changed considerably in recent years, as preschool children's use of mobile devices has tripled from 2013 to 2017, although the overall amount of e-media use has remained relatively stable (2). Recent studies also report that a large proportion (81.3%) of 4-year-old children play games, use applications, or watch videos on mobile devices daily (3).

Electronic media use (i.e. total screen time) comprises program viewing (i.e. watching of programs from TV, DVDs, mobile devices), as well as use of social media, internet and e-games. While the negative forms of e-media use (e.g., playing e-games alone), are often emphasized, the healthier forms also exist. A reasonable amount of educational electronic media material (e.g., serious games) might have beneficial effects on young children's psychosocial well-being and development (4). Moreover, e-media use involving social interactions, such as use with caregivers might be having fewer risks than the use alone, as parents can help the children to understand what they are seeing (5). Use of e-games with siblings and peers seems also to be less risky (6).

High dose use of e-media in young children can be a risk factor for the development of a child. Studies suggest that frequent e-media use in family households might interrupt parent-child interaction, which might cause problems in children's social-emotional development (1,4,7-9). Thus, high dose use of e-media can also be related to the development of a child, such as language development (10) or development of social skills (11), which are important to the children's psychosocial health. High-dose use can also develop to a behavioral addiction. While studied less among children, according to a recent study, internet- or screen-based behavioral addictions appear as a child's persistent requests to access e-media, and parents' unsuccessful attempts to control the use. It might cause problems with family members, such as parents and siblings, and lead to a loss of a child's previous hobbies and interests (12).

The World Health Organization (WHO) has published guidelines for the total screen time of children aged 2-4. The recommendation is a maximum of one hour per day for this age group (13). However, in previous studies, much higher amounts have been reported. For example, among American children aged 2-4, the average total screen time per day was 159 minutes (2), and among Finnish children aged 3-6 it was 111 min (14). It seems that parents may be unaware of the potential risks of high-dose e-media usage for their children's psychosocial well-being. Studies have even pointed out that some parents use e-media devices as a tool to calm down their children, especially when the child has social emotional difficulties (15-18). Thus, the link between e-media use and psychosocial symptoms seems to be bidirectional.

Based on the research, it seems that a high amount of program viewing is a risk for preschool-age children's psychosocial well-being (4). It is associated with externalizing problems, such as

1  
2  
3 hyperactivity (8,19) and conduct problems (19–21), and also with peer problems (22). However,  
4 fewer studies have investigated the associations between electronic game-playing and preschool-age  
5 children's psychosocial well-being (6,19,23). According to these studies, it seems that electronic  
6 game-playing might be less detrimental and may even have some positive effects on children's socio-  
7 emotional skills (6). Nonetheless, the use of electronic games and computers are associated with  
8 internalizing problems, such as emotional problems (23).  
9  
10

11  
12 As the patterns of children's electronic media usage are rapidly changing, the updated data on the  
13 degree of e-media usage and its significance on well-being is needed. Moreover, although there is  
14 evidence showing the harmful effects of preschool-age children's high-dose e-media use on their  
15 well-being, few of these studies have analyzed the longitudinal associations of early exposure of e-  
16 media to children's later psychosocial problems. According to these studies it seems that high-dose  
17 e-media use that starts at early age might be detrimental for young children's psychosocial health  
18 later on (8,19,23).  
19  
20  
21  
22

23 The aim of this research is to assess the amount of preschooler's e-media usage and its associations  
24 with their psychosocial well-being. We study longitudinal associations between e-media use at 18  
25 months and psychosocial symptoms at five years of age, as well as cross-sectional associations  
26 between e-media use (program viewing and electronic game-playing) and psychosocial symptoms at  
27 five years. Psychosocial symptoms, i.e., internalizing and externalizing problems and inattention,  
28 were assessed at five years of age. We hypothesized that children who consume large amounts of e-  
29 media at 18 months of age have more psychosocial symptoms at five years than those who use less.  
30 Moreover, we hypothesized that program viewing is associated with more problems in psychosocial  
31 health, while use of e-games has less associations with negative outcomes.  
32  
33  
34  
35

## 36 **Method**

### 37 **Study design**

38  
39 This study is part of a larger Finnish CHILD-SLEEP longitudinal birth cohort study, which includes  
40 several measurement points. The study design, protocol, participants, and measures have been  
41 described in more detail in Paavonen et al. (24). The recruitment and baseline measurement took  
42 place prenatally at the 32nd week and the follow-up measurements occurred at the birth of the child  
43 and at three, eight, 18, 24 and 60 months of age. Moreover, records from the maternity hospital and  
44 maternity clinics were collated. The study protocol was approved by the local Hospital District Ethical  
45 Committee (9.3.2011, ethical research permission code R11032). Permission for the recruitment  
46 procedure was also received from the leading doctors of the targeted health centers. Participants were  
47 also asked to give their written informed consent. Participation to the study was voluntary, and the  
48 families received no compensation for the participation.  
49  
50  
51  
52  
53  
54  
55

### 56 **Participants**

57  
58 Mothers and fathers were recruited for the study in the Pirkanmaa Hospital District area in Southern  
59 Finland. Altogether, 2244 parents gave their approval to receive prenatal questionnaires when they  
60

1  
2  
3 visited the maternity clinics, and 1679 (74.8%) of them gave their consent to participate in the study  
4 and returned the baseline questionnaires. The response rate at 5 years of age was 42.5% (N=714).  
5 Children with severe chronic illnesses or disabilities, e.g., Down's syndrome or Hirschsprung disease  
6 (n=7), and all twins (n=8) were excluded. The final sample included 699 children whose parents had  
7 answered the Strengths and Difficulties Questionnaire (SDQ) (25) or the Five-to-Fifteen (FTF) (26)  
8 questionnaire at the children's age of 5 years. The questions regarding child were asked from both  
9 parents at five years and 73.4% the answers was filled by a mother alone, 1.0% by father alone and  
10 25.5% by parents together. The questionnaire at 5 years of age included SDQ and e-media usage  
11 questions and was answered by the parents of 653 children. The FTF questionnaire was answered by  
12 the parents of 668 children. In addition, the 18-months questionnaire, which included children's  
13 media usage questions at that age, was available for 585 (out of 699) children. The 18-months  
14 questionnaire did not include measures of children's psychosocial symptoms. Information concerning  
15 maternal sociodemographic factors such as education and number of previous children were asked  
16 prenatally and they were available for 641 children.  
17  
18  
19  
20  
21  
22

### 23 **Patient and public Involvement**

24  
25 Patients or the public were not involved in the design, or conduct, or reporting of the research.  
26  
27

### 28 **Measures**

#### 29 **Screen time**

30  
31 Parents reported the time a child spent engaging in electronic media activities at both 18 months and  
32 5 years of age. Separate questions were asked for weekday and weekend e-media use on how many  
33 hours a child watches programs (including on television or other devices), and (at 5 years) how many  
34 hours a child participates in electronic game-playing (on a computer, console devices, cell phones,  
35 tablets, or other devices). Questions on electronic game-playing at 18 months were not included as  
36 their use in this age-group became more common only after our data has collected (2).  
37  
38  
39  
40  
41  
42

43 For the analyses, we first recoded all the reported electronic media use measures into minutes.  
44 Second, we calculated a weighted daily average (5/7 on weekdays and 2/7 at weekends) of the  
45 measures. At 18 months the daily average for program viewing ranged from 0 to 253 minutes. At 5  
46 years, separate measures for program viewing (range 225) and game-playing (range 182) were  
47 calculated, as well as the total screen time per day, by totaling both electronic media use measures  
48 (range 321). Finally, each of the electronic-media use measures (program viewing, game-playing,  
49 total screen time) was dichotomized using a 75 percentile cut-off to indicate those with the highest  
50 dose of e-media use: Program viewing at 18 months of age  $\geq 46$  mins per day (24.4%, n=143),  
51 program viewing at 5 years of age  $\geq 88$  mins per day (24.3%, n=161), use of electronic games at 5  
52 years of age  $\geq 45$  mins per day (19.3%, n=126), total screen time at 5 years of age  $\geq 135$  mins per day  
53 (24.6%, n=160).  
54  
55  
56  
57  
58

### 59 **Outcomes (5 years of age)**

1  
2  
3 Children's psychosocial symptoms were asked at the age of five years using two different parent-  
4 reported questionnaires: the FTF and the SDQ. From these questionnaires subscales most directly  
5 linked to the concept of psychosocial symptoms, i.e., emotional and behavioral problems and  
6 inattention, were included.  
7  
8

9  
10 The FTF questionnaire is tested for its validity and reliability for the identification of internalizing  
11 and externalizing symptoms in children aged five to fifteen years (26,27). The items are categorized  
12 into eight different domains and 22 subdomains, of which we used the following four subdomains:  
13 Attention and concentration difficulties, hyperactivity and impulsivity, emotional internalizing  
14 problems, and emotional externalizing problems (28).  
15  
16

17  
18 The SDQ children's questionnaire includes 25 items and five scales, with five items in each. It is a  
19 validated instrument to detect psychosocial problems in preschool-aged children (25), and is widely  
20 used for research purposes (19,23). In this research, we used four subscales: Hyperactivity, emotional  
21 problems, conduct problems, and peer problems.  
22  
23

24 Children scoring in the 75<sup>th</sup> percentile or over in SDQ and FTF subscales were considered to have  
25 clinically elevated levels of psychosocial symptoms. The cut-off points for the FTF scales sum scores  
26 were: Attention and concentration problems  $\geq 6$  (26%, n=172), hyperactivity and impulsivity  $\geq 6$   
27 (27.9%, n=185), emotional internalizing problems  $\geq 2$  (22.3%, n=152), and emotional externalizing  
28 problems  $\geq 4$  (22.9%, n=152). Accordingly, the cut-off points for the SDQ scale sum scores were:  
29 Inattention-hyperactivity  $\geq 5$  (25.7%, n=171), emotional problems  $\geq 2$  (18.6%, n=124), conduct  
30 problems  $\geq 3$  (32.8%, n=218), and peer problems  $\geq 3$  (25.1%, n=167).  
31  
32  
33

### 34 35 **Covariates**

36  
37 We used child's age (years, continuous), gender, number of siblings, participation in a full-time  
38 daycare (no vs. yes), and maternal education (university vs. less) as covariates that were adjusted in  
39 the statistical analyses.  
40  
41

### 42 43 **Statistical analyses**

44  
45 Data was analyzed using IBM SPSS statistics version 25. Frequencies of categorical/dichotomous  
46 variables as well as means and standard deviations of the continuous study variables were calculated  
47 first (see tables 1 and 2). Then, logistic regression analyses were conducted to calculate odds ratios  
48 and their 95% confidences intervals for the associations between electronic media use and outcomes.  
49 First longitudinal associations between e-media use at 18 months and FTF and SDQ scales at five  
50 years were analyzed (upper part of table 3). Then cross-sectional associations between e-media use  
51 and each of the subscales of FTF and SDQ at five years were analyzed (lower part of table 3 and table  
52 4). In addition to the bivariate (crude) analyses, two adjusted logistic regression models were  
53 conducted: In the first model, the child's age, gender, maternal education and screen use at 18 months  
54 of age (in the analyses at five years), and in the second, fully adjusted model, the number of siblings  
55 and information on full-time daycare participation were also added to the model.  
56  
57  
58  
59  
60

## Results

Descriptive statistics of the sample are presented in **Table 1**. The mean age of the children in the sample was 5.7 years (SD=0.5). The sample consisted of 333 girls (n=47.6%) and 366 boys (52.4%). The majority of the children (67.7%) were in full-time daycare. Most of the parents (63.4%) had a university-level degree.

On average, at 18 months of age, children spent 32.4 (SD 31.0) minutes per day with electronic media devices. At five years the amount was 114.1 minutes (SD 50.6) per day (range 321). Program viewing (mean 80.4, SD 36.3) was more popular than the use of electronic games (mean 33.4, SD 25.9).

At 18 months, 22.7% of the children spent over 60 minutes consuming screen media each day, while at 5 years of age the percentage was 94.6%. Moreover, 66.8% of the children viewed programs for more than 60 minutes per day, whereas 10.6% of the children spent more than 60 minutes per day using electronic games.

The sample was generally normative, with low levels of emotional and behavioral symptoms. The mean scores for each of the subscales of psychosocial problems based on SDQ and FTF scales are reported in **Table 2**.

**Table 3** reports the odds ratios for the associations between electronic media use at 18 months and five years of age on each of the subscales of FTF and SDQ. Based on the results, electronic media use at 18 months had less of a negative effect than at five years of age: A high amount of screen time at 18 months was associated with an increased risk of SDQ peer problems (OR=1.59,  $p=0.03$ ). The association was significant after children's age, gender, and parent's SES were adjusted (OR=1.64,  $p=0.03$ ). There was no increased risk of psychosocial problems with other subscales of FTF and SDQ.

In contrast, elevated levels of total screen time at five years of age were associated with multiple psychosocial problems: FTF attention and concentration difficulties (OR=1.88,  $p<0.01$ ), hyperactivity and impulsivity (OR=1.57,  $p=0.03$ ), internalizing symptoms (OR=1.75,  $p=0.01$ ), and externalizing symptoms (OR=1.69,  $p=0.01$ ). Moreover, it was associated with SDQ hyperactivity (OR=2.18,  $p<0.01$ ) and conduct problems (OR 1.53,  $p=0.03$ ). After fully controlling for the confounding factors, there were no other significant associations than the increased risk of FTF internalizing symptoms (OR=2.01,  $p=0.01$ ).

**Table 4** presents the odds ratios for the associations between program viewing and the use of electronic games on each of the subscales of FTF and SDQ among children at five years of age. A high amount of program viewing was associated with an increased risk of psychosocial problems, while the use of electronic games seemed less problematic. Program viewing at five years of age had an association with all of the FTF subscales (OR=1.64-1.98,  $p<0.05$ ) and with SDQ hyperactivity (OR=2.43,  $p<0.01$ ) and conduct problems (OR=1.48,  $p=0.04$ ). In the fully-adjusted model, an increased risk appeared for attention and concentration difficulties (OR=1.91,  $p=0.01$ ) and hyperactivity and impulsivity (OR=1.67,  $p=0.03$ ), and with SDQ hyperactivity (OR=2.23,  $p<0.01$ ). In contrast, the use of electronic games was associated with an increased risk of SDQ hyperactivity



(OR=1.65,  $p=0.02$ ) and only in the unadjusted model, while with the other subscales no increased risk appeared.

## Discussion

The aim of this study was to investigate the frequency of preschooler's e-media usage and the risks of high-dose e-media use on young children's psychosocial well-being. The results of our study show that 95% of preschoolers exceed the daily electronic media use recommendation of one hour, which is set by health professionals and pediatricians. Based on our results, increased screen time at five years of age was associated with a risk of multiple psychosocial symptoms, while increased levels of e-media use at 18 months had only few longitudinal associations for psychosocial symptoms at five years of age. Furthermore, high-dose use of electronic games at the age of five years seemed to be associated with fewer risks of psychosocial well-being than program viewing.

Based on the results of this study, preschoolers' average daily screen time is 114 minutes at five years of age. This number is almost two times higher than the recommended daily maximum amount of e-media, which is 60 minutes (5,13). Previous studies on preschoolers' e-media use conducted in Finland have reported similar results, as the total daily screen time was 111 minutes in 2017 (14), while in Belgium it was 81 minutes (29) in 2018. Among American children, the total screen time in 2017 in this age group was somewhat higher: 159 minutes (2). It has been suggested that the products and usage culture of electronic media develops very rapidly in United States (2,30), whereas access to products might occur at a slower pace in other countries. This might explain why the frequency of usage among young children in the US is higher than in Europe.

We discovered that high screen use at 5 years of age was associated with a risk of multiple psychosocial problems. More precisely, elevated levels of total screen time were associated with attention and concentration difficulties, hyperactivity and impulsivity, emotional internalizing and externalizing symptoms, and conduct problems. Similar results have been recently reported on emotional symptoms (19,23,31), conduct problems, and hyperactivity (31). Regarding hyperactivity, previous studies suggest that screen time may hinder the availability for activities that are considered to enhance cognitive capacities and stimulate longer attention span (32). Moreover, the harmful effect of television viewing might function by displacing developmentally important learning opportunities with an attention-capturing stimulus with a lack of developmental value (9,33). Previous studies have also reported associations between increased total screen time and peer problems (31). We did not find such associations at five years. This difference might be explained by the age of the participants: In the study of Wu et al. (2017) the mean age of the participants was 4.37, whereas in our study it was 5.68. In line with this, our findings show that screen time at an earlier age, i.e., at 18 months, was associated with peer problems later on. It seems that a high amount of screen use at a younger age is a risk factor for peer problems. However, unlike some other studies (8,19,23) we did not find high-dose use of electronic devices at 18 months of age to be associated with other problems in psychosocial well-being later on. It is possible that parents regulate younger children's e-media usage habits, while later on, other factors may have a more important role in the amount of usage. These are for example certain inherited personality traits of a child, such as persistence and introversion (34), or their participation in daycare.

1  
2  
3  
4 Our results show that an increased amount of program viewing at 5 years of age is associated with a  
5 risk of several psychosocial problems, while electronic game use had fewer associations, which  
6 is also consistent with recent previous studies (6,19,23). Electronic game-playing was  
7 only associated with SDQ hyperactivity, whereas no risks were found regarding other psychosocial  
8 symptoms. Previous studies have yielded an association between electronic game-playing and  
9 emotional symptoms. However, the direction of the association is contradictory: Increased e-game  
10 use has been associated with emotional problems (23), but also with better socio-emotional skills  
11 (6). The few associations between socioemotional health and game-playing might be explained by  
12 the social nature of game-playing: Children often participate in the use of e-games with siblings and  
13 other family members, for example, and develop their social and emotional skills in these social  
14 interactions (6). All in all, the amount of daily e-game usage in our study and all of these other studies  
15 was much lower compared to program viewing, which might explain why e-games are not associated  
16 with psychosocial problems to any larger extent at this age.  
17  
18  
19  
20  
21  
22

23 As our results point out, increased screen time has multiple risks for children's psychosocial well-  
24 being. These risk factors might accumulate in the long-term, and cause problems in children's socio-  
25 emotional development later on. Health professionals and pediatricians play an important role as  
26 communicators of the current research results on the safe usage of e-media for families. Parents'  
27 knowledge might further help them to set safe boundaries for young children's e-media use and  
28 protect children's psychosocial health from associated risk factors (35).  
29  
30  
31

32 One possible mechanism accounting for the result might be that the time children spend on e-media  
33 reduces the time spend on constructive activities, such as interactions with family members, reading  
34 and playing (1,4,7). At an early age, children's socio-emotional development occurs in a dynamic  
35 interplay between social learning and environmental factors. Furthermore, if the surrounding  
36 environment does not offer enough means for a child's healthy development, it might affect a  
37 children's psychosocial well-being (36). Genetic dispositions also play a role in modifying individual  
38 risks. However, the direction of the effect of e-media use is unclear, as some parents might use e-  
39 media devices as a tool to calm their children down, especially when the child has socio-emotional  
40 difficulties (15). It is possible, that there is a bidirectional link between the two factors.  
41  
42  
43  
44

45 One strength of our study is its longitudinal study setting and its repeated measurement of e-media  
46 exposure. Moreover, patterns of children's electronic media usage are rapidly changing, and our study  
47 offers results on the associations between young children's e-media use and their psychosocial well-  
48 being based on recent data. In addition, the sample is based on a representative birth cohort recruited  
49 during pregnancy.  
50  
51  
52

53 A limitation of our study is that those with lower education seem to be underrepresented in the sample,  
54 which is common according to studies on drop-out rates in longitudinal studies on mental health (37).  
55 Moreover, single mothers are underrepresented in the sample. Another limitation is that psychosocial  
56 symptoms at 18 months of age were not assessed. The measurement of e-media use was based on  
57 parental questionnaires and not logs or objective or observational measures. Therefore, the reported  
58 amounts of e-media use are prone to recall bias or social-desirability bias (over-reporting or  
59  
60

1  
2  
3 underreporting the actual usage). If this bias is randomly distributed among the children, it does not  
4 affect the findings. However, if it is related to exposure or outcome, it might have some effect on the  
5 findings. Thus, in future studies, parent reports of children's e-media use need to be validated with  
6 objective measures. However, of note is that in a previous study (14) conducted in Finland among a  
7 comparable age-group and using parental logs on child's e-media use, the reported daily total e-media  
8 exposure was 111 minutes, while in our study the respective figure was 114 minutes. This suggests  
9 that the reported exposures in our study could be relatively reliable. In the future, more research is  
10 needed on the family conditions of high-dose e-media users.  
11  
12  
13  
14

## 15 **Conclusion**

16  
17 This study reported the risks associated with high-dose use of electronic media devices by young  
18 children. Our results show that 5-year-old children spend considerably more time on e-media than is  
19 recommended by professionals. Our results further indicate that high levels of e-media use, especially  
20 program viewing, is associated with problems with psychosocial outcomes, while use of e-games was  
21 only associated with hyperactivity in the crude models. Children's social-emotional development is  
22 influenced by environmental factors, including electronic media habits. Although children's  
23 electronic media use patterns might not seem problematic when considering use on a daily level, they  
24 do have risks in the long term. Thus, health professionals play a key role in providing information for  
25 parents on screen media parenting, i.e., the safe use of e-media devices among young children in  
26 order to protect their healthy development.  
27  
28  
29  
30  
31

## 32 **Acknowledgement**

33  
34 The authors would like to thank all the families that participated in the CHILD-SLEEP and  
35 Finnbrain birth cohorts. The authors are also grateful for the nurses at the maternity clinics who  
36 introduced the study to the families.  
37  
38  
39

## 40 **Contributorship statement**

41  
42 EJP and OSH designed the study. JN, OK, and EJP were primarily responsible for data analysis and  
43 writing of the article. RV and OSH contributed critically to the writing of the article.  
44  
45

## 46 **Competing interests**

47  
48 The authors declare no competing interests.  
49

## 50 **Funding**

51  
52 This work was supported by The Academy of Finland (#308588, #277557), the Signe and Ane  
53 Gyllenberg foundation, the Yrjö Jahnsson Foundation, the Foundation for Pediatric Research, the  
54 Finnish Cultural Foundation, the Competitive Research Financing of the Expert Responsibility area  
55 of Tampere University Hospital, and Doctors' Association in Tampere.  
56  
57  
58

## 59 **Data sharing statement**

Data is not publicly available due to legal restrictions and confidential nature of the data. Data is available upon request. Requests may be sent to The Finnish Institute for Health and Welfare, who is the controller of the data. For more information about data access, please see <https://thl.fi/en/web/thlfi-en/statistics/information-for-researchers>.

## References

1. Radesky JS. Increase in Screen Time Implications for Early Childhood Development and Behavior. 2016;63:827–39.
2. Rideout V. “The common sense census: Media use by kids age zero to eight.” San Francisco, CA; 2017.
3. Kabali HK, Irigoyen MM, Nunez-Davis R, Budacki JG, Mohanty SH, Leister KP, et al. Exposure and use of mobile media devices by young children. *Pediatrics*. 2015;136(6):1044–50.
4. Gerwin RL, Kaliebe K, Daigle M. The Interplay Between Digital Media Use and Development. *Child Adolesc Psychiatr Clin N Am*. 2018;27(2):345–55.
5. American Academy of Pediatrics. American Academy of Pediatrics Announces New Recommendations for Children’s Media Use. 2016.
6. Hinkley T, Timperio A, Salmon J, Hesketh AK. Does preschool physical activity and electronic media use predict later social and emotional skills at 6 to 8 years? A cohort study. *J Phys Act Heal*. 2017;14(4):308–16.
7. Christakis DA, Gilkerson J, Richards JA, Zimmerman FJ, Garrison MM, Xu D, et al. Audible television and decreased adult words, infant vocalizations, and conversational turns: A population-based study. *Arch Pediatr Adolesc Med*. 2009;163(6):554–8.
8. Christakis DA, Zimmerman FJ, DiGiuseppe DL, McCarty CA. Early Television Exposure and Subsequent Attentional Problems in Children. *Pediatrics*. 2004;113(4 Pt 1):708–13.
9. Lissak G. Adverse physiological and psychological effects of screen time on children and adolescents: Literature review and case study. *Environ Res*. 2018;164(October 2017):149–57. Available from: <https://doi.org/10.1016/j.envres.2018.01.015>
10. Madigan S, McArthur BA, Anhorn C, Eirich R, Christakis DA. Associations Between Screen Use and Child Language Skills: A Systematic Review and Meta-analysis. *JAMA Pediatr*. 2020 Jul 1;174(7):665–75. Available from: <https://doi.org/10.1001/jamapediatrics.2020.0327>
11. Immordino-yang MH, Mccoll A, Damasio H, Damasio A. Neural correlates of admiration and compassion. 2009;106(19).
12. Domoff SE, Harrison K, Gearhardt AN, Douglas A, Lumeng JC, Miller AL, et al. Development and Validation of the Problematic Media Use Measure: A Parent Report Measure of Screen Media “Addiction” in Children. *Psychol Pop Media Cult*. 2020;8(1):2–11.
13. WHO. Guidelines on physical activity, sedentary behaviour and sleep for children under 5 years of age. World Health Organization. 2019. 33 p.
14. Määttä S, Kontinen H, Haukkala A, Erkkola M, Roos E. Preschool children’s context-specific sedentary behaviours and parental socioeconomic status in Finland: A cross-sectional study. *BMJ Open*. 2017;7(11):1–10.
15. Radesky JS, Peacock-Chambers E, Zuckerman B, Silverstein M. Use of mobile technology to calm upset children: Associations with social-emotional development. *JAMA Pediatr*. 2016;170(4):397–9.
16. Paudel S, Jancey J, Subedi N, Leavy J. Correlates of mobile screen media use among children aged 0-8: A systematic review. *BMJ Open*. 2017;7(10):1–12.
17. Jones RA, Downing K, Rinehart NJ, Barnett LM, May T, McGillivray JA, et al. Physical activity, sedentary behavior and their correlates in children with Autism Spectrum Disorder: A systematic review. *PLoS One*. 2017 Feb 28;12(2):e0172482. Available from: <https://doi.org/10.1371/journal.pone.0172482>
18. Chonchaiya W, Nuntnarumit P, Pruksananonda C. Comparison of television viewing between children with autism spectrum disorder and controls. *Acta Paediatr Int J Paediatr*. 2011;100(7):1033–7.
19. McNeill J, Howard SJ, Vella SA, Cliff DP. Longitudinal Associations of Electronic Application Use and Media Program Viewing with Cognitive and Psychosocial Development in Preschoolers. *Acad Pediatr*. 2019;19(5):520–8. Available from: <https://doi.org/10.1016/j.acap.2019.02.010>
20. Wu X, Tao S, Rutayisire E, Chen Y, Huang K, Tao F. The relationship between screen time, nighttime sleep duration, and behavioural problems in preschool children in China. *Eur Child Adolesc Psychiatry*. 2017;26(5):541–8.
21. Manganello JA, Taylor CA. Television exposure as a risk factor for aggressive behavior among 3-year-old children. *Arch Pediatr Adolesc Med*. 2009;163(11):1037–45.

- 1  
2  
3 22. Pagani LS, Fitzpatrick C, Barnett TA, Dubow E. Prospective associations between early childhood television exposure and academic, psychosocial, and physical well-being by middle childhood. *Arch Pediatr Adolesc Med.* 2010;164(5):425–31.
- 4  
5  
6 23. Hinkley T, Verbestel V, Ahrens W, Lissner L, Molnar D, Moreno LA, et al. Early childhood electronic media use as a predictor of poorer well-being: a prospective cohort study. *JAMA Pediatr.* 2014;168(5):485–92.
- 7  
8 24. Paavonen JE, Saarenpää-Heikkilä O, Pölkki P, Kylliäinen A, Porkka-Heiskanen T, Paunio T. Maternal and paternal sleep during pregnancy in the Child-sleep birth cohort. *Sleep Med.* 2017;29:47–56.
- 9  
10 25. Theunissen MHC, Vogels AGC, De Wolff MS, Reijneveld SA. Characteristics of the strengths and difficulties questionnaire in preschool children. *Pediatrics.* 2013;131(2):3–4.
- 11  
12 26. Korkman M, Jaakkola M, Ahlroth A, Pesonen AE, Turunen MM. Screening of developmental disorders in five-year-olds using the FTF (Five to Fifteen) questionnaire: A validation study. *Eur Child Adolesc Psychiatry, Suppl.* 2004;13(3):31–8.
- 13  
14 27. Bohlin G, Janols LO. Behavioural problems and psychiatric symptoms in 5-13 year-old Swedish children - A comparison of parent ratings on the FTF (Five to Fifteen) with the ratings on CBCL (Child Behavior Checklist). *Eur Child Adolesc Psychiatry, Suppl.* 2004;13(3):14–22.
- 15  
16 28. Kadesjö B, Janols LO, Korkman M, Mickelsson K, Strand G, Trillingsgaard A, et al. The FTF (Five to Fifteen): The development of a parent questionnaire for the assessment of ADHD and comorbid conditions. *Eur Child Adolesc Psychiatry, Suppl.* 2004;13(3):3–13.
- 17  
18 29. De Craemer M, McGregor D, Androustos O, Manios Y, Cardon G. Compliance with 24-h movement behaviour guidelines among belgian pre-school children: The toybox-study. *Int J Environ Res Public Health.* 2018;15(10):1–10.
- 19  
20 30. Vandewater EA, Rideout VJ, Wartella EA, Huang X, Lee JH, Shim MS. Digital childhood: Electronic media and technology use among infants, toddlers, and preschoolers. *Pediatrics.* 2007;119(5).
- 21  
22 31. Wu X, Tao S, Rutayisire E, Chen Y, Huang K, Tao F. The relationship between screen time, nighttime sleep duration, and behavioural problems in preschool children in China. *Eur Child Adolesc Psychiatry.* 2017;26(5):541–8.
- 23  
24 32. Nikkelen SWC, Valkenburg PM, Huizinga M, Bushman BJ. Media Use and ADHD-Related Behaviors in Children and Adolescents : A Meta-Analysis. 2014;50(9):2228–41.
- 25  
26 33. Zimmerman FJ, Christakis DA. Associations Between Content Types of Early Media Exposure and Subsequent Attentional Problems. *Pediatrics.* 2007;120(5):986–92.
- 27  
28 34. Allen MS, Vella SA, Laborde S. Sport participation, screen time, and personality trait development during childhood. *Br J Dev Psychol.* 2015;33(3):375–90.
- 29  
30 35. Connor TMO, Hingle M, Chuang R, Gorely T, Hinkley T, Jago R, et al. Conceptual Understanding of Screen Media Parenting: Report of a Working Group. 2013;9(August):110–9.
- 31  
32 36. Feldman R, Eidelman AI. Biological and environmental initial conditions shape the trajectories of cognitive and social-emotional development across the first years of life. *Dev Sci.* 2009;12(1):194–200.
- 33  
34 37. Granero Pérez R, Ezpeleta L, Domenech JM. Features associated with the non-participation and drop out by socially-at-risk children and adolescents in mental-health epidemiological studies. *Soc Psychiatry Psychiatr Epidemiol.* 2007;42(3):251–8.
- 35  
36  
37  
38  
39  
40  
41  
42  
43  
44  
45  
46  
47  
48  
49  
50  
51  
52  
53

54 Table 1. Descriptive statistics of sociodemographic factors and measures of screen time (N=699).

|                                 | % (N)      |
|---------------------------------|------------|
| <b>Sociodemographic factors</b> |            |
| Child's gender                  |            |
| Girls                           | 47.6 (333) |

|    |                                                           |                     |
|----|-----------------------------------------------------------|---------------------|
| 1  |                                                           |                     |
| 2  |                                                           |                     |
| 3  | Boys                                                      | 52.4 (366)          |
| 4  | Child's age, years; mean (SD)                             | 5.68 (0.54)         |
| 5  | Maternal education                                        |                     |
| 6  | University-level degree                                   | 63.4 (409)          |
| 7  | Less than university-level degree                         | 36.6 (236)          |
| 8  | Number of siblings                                        |                     |
| 9  | 0                                                         | 51.0 (327)          |
| 10 | 1                                                         | 32.2 (207)          |
| 11 | 2                                                         | 12.9 (83)           |
| 12 | 3                                                         | 2.5 (16)            |
| 13 | 4 or more                                                 | 1.2 (8)             |
| 14 | Full-time daycare                                         |                     |
| 15 | No                                                        | 32.3 (214)          |
| 16 | Yes                                                       | 67.7 (448)          |
| 17 |                                                           |                     |
| 18 | <b>Screen time</b>                                        |                     |
| 19 | Total screen time at 18 months, min; mean (SD), range     | 32.4 (31.0), 252.9  |
| 20 | Over 60 minutes, %                                        | 22.7 (136)          |
| 21 | Over 120 minutes, %                                       | 2.8 (17)            |
| 22 | Program viewing at 5 years, min; mean (SD), range         | 80.4 (36.3), 225.0  |
| 23 | Over 60 minutes, %                                        | 66.8 (442)          |
| 24 | Over 120 minutes, %                                       | 16.9 (112)          |
| 25 | Electronic game-playing at 5 years, min; mean (SD), range | 33.4 (25.9), 182.1  |
| 26 | Over 60 minutes, %                                        | 10.6 (69)           |
| 27 | Over 120 minutes, %                                       | 2.3 (15)            |
| 28 | Total screen time at 5 years, min; mean (SD), range       | 114.1 (50.6), 321.4 |
| 29 | Over 60 minutes, %                                        | 94.6 (615)          |
| 30 | Over 120 minutes, %                                       | 40.2 (261)          |
| 31 | Over 180 minutes, %                                       | 11.5 (75)           |
| 32 |                                                           |                     |
| 33 |                                                           |                     |
| 34 |                                                           |                     |
| 35 |                                                           |                     |
| 36 |                                                           |                     |
| 37 |                                                           |                     |
| 38 |                                                           |                     |
| 39 |                                                           |                     |
| 40 |                                                           |                     |
| 41 |                                                           |                     |
| 42 |                                                           |                     |
| 43 |                                                           |                     |
| 44 |                                                           |                     |
| 45 |                                                           |                     |
| 46 |                                                           |                     |
| 47 |                                                           |                     |
| 48 |                                                           |                     |
| 49 |                                                           |                     |
| 50 |                                                           |                     |
| 51 |                                                           |                     |
| 52 |                                                           |                     |
| 53 |                                                           |                     |
| 54 |                                                           |                     |
| 55 |                                                           |                     |
| 56 |                                                           |                     |
| 57 |                                                           |                     |
| 58 |                                                           |                     |
| 59 |                                                           |                     |
| 60 |                                                           |                     |

1  
2  
3  
4  
5  
6  
7  
8  
9  
10  
11  
12  
13  
14  
15  
16  
17  
18  
19  
20  
21  
22  
23  
24  
25  
26  
27  
28  
29  
30  
31  
32  
33  
34  
35  
36  
37  
38  
39  
40  
41  
42  
43  
44  
45  
46  
47  
48  
49  
50  
51  
52  
53  
54  
55  
56  
57  
58  
59  
60

Table 2. Outcome variables.

| Outcome variable                         | Mean (SD)   | Range |
|------------------------------------------|-------------|-------|
| FTF                                      |             |       |
| Attention and concentration difficulties | 3.75 (3.41) | 18.00 |
| Hyperactivity and impulsivity            | 3.98 (3.63) | 18.00 |
| Emotional/internalizing symptoms         | 1.52 (1.79) | 15.00 |
| Emotional/externalizing symptoms         | 2.83 (3.25) | 21.00 |
| SDQ                                      |             |       |
| Hyperactivity                            | 3.04 (2.34) | 10.00 |
| Emotional problems                       | 1.38 (1.48) | 9.00  |
| Conduct problems                         | 1.97 (1.59) | 9.00  |
| Peer problems                            | 1.69 (1.38) | 9.00  |

For peer review only

Table 3. Associations between electronic media use at 18 months and 5 years of age with psychosocial well-being at age 5 years.

| <i>Screen time: 18 months of age</i>     | <i>Crude</i> |                  |                 | <i>Adjusted 1<sup>a</sup></i> |                  |             | <i>Adjusted 2<sup>b</sup></i> |                  |             |
|------------------------------------------|--------------|------------------|-----------------|-------------------------------|------------------|-------------|-------------------------------|------------------|-------------|
|                                          | <i>OR</i>    | <i>95% CI</i>    | <i>p</i>        | <i>OR</i>                     | <i>95% CI</i>    | <i>p</i>    | <i>OR</i>                     | <i>95% CI</i>    | <i>p</i>    |
| <b>FTF</b>                               |              |                  |                 |                               |                  |             |                               |                  |             |
| Attention and concentration difficulties | 1.46         | 0.96-2.22        | 0.07            | 1.50                          | 0.97-2.31        | 0.07        | 1.41                          | 0.89-2.22        | 0.14        |
| Hyperactivity and impulsivity            | 1.16         | 0.76-1.77        | 0.50            | 1.16                          | 0.75-1.81        | 0.50        | 1.14                          | 0.72-1.80        | 0.59        |
| Emotional/internalizing symptoms         | 1.19         | 0.76-1.88        | 0.45            | 1.15                          | 0.72-1.85        | 0.55        | 1.13                          | 0.69-1.86        | 0.62        |
| Emotional/externalizing symptoms         | 1.03         | 0.66-1.60        | 0.91            | 1.04                          | 0.65-1.65        | 0.88        | 1.06                          | 0.65-1.72        | 0.82        |
| <b>SDQ</b>                               |              |                  |                 |                               |                  |             |                               |                  |             |
| Hyperactivity                            | 1.49         | 0.98-2.26        | 0.06            | 1.37                          | 0.89-2.12        | 0.15        | 1.37                          | 0.87-2.18        | 0.18        |
| Emotional problems                       | 1.36         | 0.86-2.17        | 0.19            | 1.38                          | 0.85-2.23        | 0.19        | 1.47                          | 0.88-2.45        | 0.14        |
| Conduct problems                         | 1.24         | 0.84-1.84        | 0.28            | 1.26                          | 0.84-1.90        | 0.27        | 1.23                          | 0.80-1.90        | 0.35        |
| Peer problems                            | <b>1.59</b>  | <b>1.04-2.41</b> | <b>0.03</b>     | <b>1.64</b>                   | <b>1.06-2.52</b> | <b>0.03</b> | 1.56                          | 0.98-2.46        | 0.06        |
| <b>Total screen time: 5 years of age</b> |              |                  |                 |                               |                  |             |                               |                  |             |
| <b>FTF</b>                               |              |                  |                 |                               |                  |             |                               |                  |             |
| Attention and concentration difficulties | <b>1.88</b>  | <b>1.27-2.80</b> | <b>&lt;0.01</b> | 1.45                          | 0.92-2.28        | 0.11        | 1.57                          | 0.97-2.53        | 0.07        |
| Hyperactivity and impulsivity            | <b>1.57</b>  | <b>1.06-2.33</b> | <b>0.03</b>     | 1.33                          | 0.85-2.12        | 0.22        | 1.31                          | 0.81-2.13        | 0.28        |
| Emotional/internalizing symptoms         | <b>1.75</b>  | <b>1.15-2.65</b> | <b>0.01</b>     | <b>1.84</b>                   | <b>1.14-2.97</b> | <b>0.01</b> | <b>2.01</b>                   | <b>1.21-3.34</b> | <b>0.01</b> |
| Emotional/externalizing symptoms         | <b>1.69</b>  | <b>1.12-2.55</b> | <b>0.01</b>     | 1.39                          | 0.87-2.23        | 0.17        | 1.54                          | 0.94-2.52        | 0.09        |
| <b>SDQ</b>                               |              |                  |                 |                               |                  |             |                               |                  |             |
| Hyperactivity                            | <b>2.18</b>  | <b>1.49-3.20</b> | <b>&lt;0.01</b> | <b>1.60</b>                   | <b>1.02-2.49</b> | <b>0.04</b> | 1.55                          | 0.97-2.48        | 0.07        |
| Emotional problems                       | 0.99         | 0.62-1.56        | 0.95            | 0.98                          | 0.58-1.66        | 0.94        | 0.90                          | 0.49-1.61        | 0.70        |
| Conduct problems                         | <b>1.53</b>  | <b>1.05-2.21</b> | <b>0.03</b>     | 1.24                          | 0.81-1.91        | 0.32        | 1.06                          | 0.67-1.67        | 0.80        |
| Peer problems                            | 1.06         | 0.71-1.60        | 0.77            | 0.90                          | 0.56-1.45        | 0.67        | 0.85                          | 0.51-1.42        | 0.53        |

<sup>a</sup> Adjusted for age, gender, maternal education. Total screen time at 5 years of age: Also adjusted for screen time at 18 months of age.

<sup>b</sup> Adjusted for age, gender, maternal education, number of siblings, and daycare participation. Total screen time at 5 years of age: Also adjusted for screen time at 18 months of age.



Table 4. Associations between program viewing and use of electronic games at 5 years of age with psychosocial well-being.

| <b>Program viewing: 5 years of age</b>         | <b>Crude</b> |                  |                 | <b>Adjusted 1<sup>a</sup></b> |                  |                 | <b>Adjusted 2<sup>b</sup></b> |                  |                 |          |
|------------------------------------------------|--------------|------------------|-----------------|-------------------------------|------------------|-----------------|-------------------------------|------------------|-----------------|----------|
|                                                | <b>FTF</b>   | <b>OR</b>        | <b>95% CI</b>   | <b>p</b>                      | <b>OR</b>        | <b>95% CI</b>   | <b>p</b>                      | <b>OR</b>        | <b>95% CI</b>   | <b>p</b> |
| Attention and concentration difficulties       | <b>1.98</b>  | <b>1.34-2.93</b> | <b>&lt;0.01</b> | <b>1.71</b>                   | <b>1.10-2.69</b> | <b>0.02</b>     | <b>1.91</b>                   | <b>1.19-3.08</b> | <b>0.01</b>     |          |
| Hyperactivity and impulsivity                  | <b>1.64</b>  | <b>1.11-2.42</b> | <b>0.01</b>     | <b>1.68</b>                   | <b>1.07-2.63</b> | <b>0.02</b>     | <b>1.67</b>                   | <b>1.04-2.69</b> | <b>0.03</b>     |          |
| Emotional/internalizing symptoms               | <b>1.68</b>  | <b>1.11-2.54</b> | <b>0.01</b>     | 1.59                          | 0.99-2.55        | 0.06            | <b>1.71</b>                   | <b>1.03-2.84</b> | <b>0.04</b>     |          |
| Emotional/externalizing symptoms               | <b>1.69</b>  | <b>1.12-2.55</b> | <b>0.01</b>     | 1.14                          | 0.71-1.84        | 0.59            | 1.19                          | 0.72-1.96        | 0.50            |          |
| <b>SDQ</b>                                     |              |                  |                 |                               |                  |                 |                               |                  |                 |          |
| Hyperactivity                                  | <b>2.43</b>  | <b>1.66-3.56</b> | <b>&lt;0.01</b> | <b>2.29</b>                   | <b>1.47-3.55</b> | <b>&lt;0.01</b> | <b>2.23</b>                   | <b>1.40-3.54</b> | <b>&lt;0.01</b> |          |
| Emotional problems                             | 0.99         | 0.63-1.56        | 0.97            | 0.94                          | 0.56-1.57        | 0.80            | 0.86                          | 0.48-1.53        | 0.60            |          |
| Conduct problems                               | <b>1.49</b>  | <b>1.03-2.15</b> | <b>0.04</b>     | 1.31                          | 0.85-2.00        | 0.22            | 1.16                          | 0.74-1.82        | 0.51            |          |
| Peer problems                                  | 1.04         | 0.69-1.56        | 0.86            | 0.93                          | 0.58-1.50        | 0.77            | 0.87                          | 0.52-1.44        | 0.58            |          |
| <b>Use of electronic games: 5 years of age</b> |              |                  |                 |                               |                  |                 |                               |                  |                 |          |
| <b>FTF</b>                                     | <b>OR</b>    | <b>95% CI</b>    | <b>p</b>        | <b>OR</b>                     | <b>95% CI</b>    | <b>p</b>        | <b>OR</b>                     | <b>95% CI</b>    | <b>p</b>        |          |
| Attention and concentration difficulties       | 0.95         | 0.60-1.51        | 0.82            | 0.69                          | 0.41-1.16        | 0.16            | 0.67                          | 0.38-1.17        | 0.16            |          |
| Hyperactivity and impulsivity                  | 1.20         | 0.77-1.87        | 0.42            | 0.89                          | 0.54-1.48        | 0.66            | 0.82                          | 0.48-1.42        | 0.48            |          |
| Emotional/internalizing symptoms               | 1.22         | 0.76-1.96        | 0.40            | 1.27                          | 0.75-2.16        | 0.38            | 1.36                          | 0.78-2.40        | 0.28            |          |
| Emotional/externalizing symptoms               | 1.37         | 0.86-2.16        | 0.19            | 1.23                          | 0.74-2.05        | 0.42            | 1.42                          | 0.83-2.42        | 0.20            |          |
| <b>SDQ</b>                                     |              |                  |                 |                               |                  |                 |                               |                  |                 |          |
| Hyperactivity                                  | <b>1.65</b>  | <b>1.08-2.51</b> | <b>0.02</b>     | 1.06                          | 0.65-1.72        | 0.81            | 0.98                          | 0.58-1.66        | 0.95            |          |
| Emotional problems                             | 0.95         | 0.58-1.58        | 0.85            | 1.10                          | 0.63-1.92        | 0.75            | 1.04                          | 0.55-1.97        | 0.90            |          |
| Conduct problems                               | 1.04         | 0.69-1.57        | 0.85            | 0.88                          | 0.55-1.40        | 0.58            | 0.75                          | 0.50-1.25        | 0.27            |          |
| Peer problems                                  | 1.10         | 0.71-1.70        | 0.69            | 0.87                          | 0.52-1.46        | 0.60            | 0.83                          | 0.48-1.44        | 0.51            |          |

<sup>a</sup> Adjusted for age, gender, maternal education, screen time at 18 months of age.

<sup>b</sup> Adjusted for age, gender, maternal education, siblings, and daycare participation, screen time at 18 months of age.

**STROBE 2007 (v4) Statement—Checklist of items that should be included in reports of *cohort studies***

| Section/Topic                | Item # | Recommendation                                                                                                                                                                       | Reported on page # |
|------------------------------|--------|--------------------------------------------------------------------------------------------------------------------------------------------------------------------------------------|--------------------|
| <b>Title and abstract</b>    | 1      | (a) Indicate the study's design with a commonly used term in the title or the abstract                                                                                               | 1                  |
|                              |        | (b) Provide in the abstract an informative and balanced summary of what was done and what was found                                                                                  | Abstract page      |
| <b>Introduction</b>          |        |                                                                                                                                                                                      |                    |
| Background/rationale         | 2      | Explain the scientific background and rationale for the investigation being reported                                                                                                 | 1-2                |
| Objectives                   | 3      | State specific objectives, including any prespecified hypotheses                                                                                                                     | 2                  |
| <b>Methods</b>               |        |                                                                                                                                                                                      |                    |
| Study design                 | 4      | Present key elements of study design early in the paper                                                                                                                              | 2-3                |
| Setting                      | 5      | Describe the setting, locations, and relevant dates, including periods of recruitment, exposure, follow-up, and data collection                                                      | 2-3                |
| Participants                 | 6      | (a) Give the eligibility criteria, and the sources and methods of selection of participants. Describe methods of follow-up                                                           | 3                  |
|                              |        | (b) For matched studies, give matching criteria and number of exposed and unexposed                                                                                                  |                    |
| Variables                    | 7      | Clearly define all outcomes, exposures, predictors, potential confounders, and effect modifiers. Give diagnostic criteria, if applicable                                             | 3-4                |
| Data sources/<br>measurement | 8*     | For each variable of interest, give sources of data and details of methods of assessment (measurement). Describe comparability of assessment methods if there is more than one group | 3-4                |
| Bias                         | 9      | Describe any efforts to address potential sources of bias                                                                                                                            | 8                  |
| Study size                   | 10     | Explain how the study size was arrived at                                                                                                                                            | 3                  |
| Quantitative variables       | 11     | Explain how quantitative variables were handled in the analyses. If applicable, describe which groupings were chosen and why                                                         | 3-4                |
| Statistical methods          | 12     | (a) Describe all statistical methods, including those used to control for confounding                                                                                                | 4-5                |
|                              |        | (b) Describe any methods used to examine subgroups and interactions                                                                                                                  | -                  |
|                              |        | (c) Explain how missing data were addressed                                                                                                                                          | 3                  |
|                              |        | (d) If applicable, explain how loss to follow-up was addressed                                                                                                                       |                    |
|                              |        | (e) Describe any sensitivity analyses                                                                                                                                                | -                  |

|                          |     |                                                                                                                                                                                                              |                |
|--------------------------|-----|--------------------------------------------------------------------------------------------------------------------------------------------------------------------------------------------------------------|----------------|
| <b>Results</b>           |     |                                                                                                                                                                                                              |                |
| Participants             | 13* | (a) Report numbers of individuals at each stage of study—eg numbers potentially eligible, examined for eligibility, confirmed eligible, included in the study, completing follow-up, and analysed            | 3-4            |
|                          |     | (b) Give reasons for non-participation at each stage                                                                                                                                                         | 3-4            |
|                          |     | (c) Consider use of a flow diagram                                                                                                                                                                           |                |
| Descriptive data         | 14* | (a) Give characteristics of study participants (eg demographic, clinical, social) and information on exposures and potential confounders                                                                     | 4-5            |
|                          |     | (b) Indicate number of participants with missing data for each variable of interest                                                                                                                          | 4              |
|                          |     | (c) Summarise follow-up time (eg, average and total amount)                                                                                                                                                  | 4-5            |
| Outcome data             | 15* | Report numbers of outcome events or summary measures over time                                                                                                                                               | Table 2        |
| Main results             | 16  | (a) Give unadjusted estimates and, if applicable, confounder-adjusted estimates and their precision (eg, 95% confidence interval). Make clear which confounders were adjusted for and why they were included | Tables 3 and 4 |
|                          |     | (b) Report category boundaries when continuous variables were categorized                                                                                                                                    | 3-4            |
|                          |     | (c) If relevant, consider translating estimates of relative risk into absolute risk for a meaningful time period                                                                                             |                |
| Other analyses           | 17  | Report other analyses done—eg analyses of subgroups and interactions, and sensitivity analyses                                                                                                               | -              |
| <b>Discussion</b>        |     |                                                                                                                                                                                                              |                |
| Key results              | 18  | Summarise key results with reference to study objectives                                                                                                                                                     | 6              |
| <b>Limitations</b>       |     |                                                                                                                                                                                                              |                |
| Interpretation           | 20  | Give a cautious overall interpretation of results considering objectives, limitations, multiplicity of analyses, results from similar studies, and other relevant evidence                                   | 8              |
| Generalisability         | 21  | Discuss the generalisability (external validity) of the study results                                                                                                                                        | 8              |
| <b>Other information</b> |     |                                                                                                                                                                                                              |                |
| Funding                  | 22  | Give the source of funding and the role of the funders for the present study and, if applicable, for the original study on which the present article is based                                                | 9              |

\*Give information separately for cases and controls in case-control studies and, if applicable, for exposed and unexposed groups in cohort and cross-sectional studies.

**Note:** An Explanation and Elaboration article discusses each checklist item and gives methodological background and published examples of transparent reporting. The STROBE checklist is best used in conjunction with this article (freely available on the Web sites of PLoS Medicine at <http://www.plosmedicine.org/>, Annals of Internal Medicine at <http://www.annals.org/>, and Epidemiology at <http://www.epidem.com/>). Information on the STROBE Initiative is available at [www.strobe-statement.org](http://www.strobe-statement.org).
